# Supplementary material
Source: PubMed Central journal article supplement (PMC5130123)
Supplement: npp2015169x1.pdf [file npp2015169x1.pdf]

**Differential Methylation in F1**

| GeneName | proteinName                                      | dif (MAM-SAL) |
|----------|--------------------------------------------------|---------------|
| A1bg     | alpha-1B-glycoprotein precursor                  | 16.8191       |
| Aass     | alpha-aminoacidic semialdehyde synthase,         | 8.5052        |
| Abcb7    | ATP-binding cassette sub-family B member 7,      | -9.0831       |
| Abcb9    | ATP-binding cassette sub-family B member 9       | -8.5067       |
| Abcc4    | multidrug resistance-associated protein 4        | 10.3648       |
| Abcc6    | multidrug resistance-associated protein 6        | -14.1499      |
| Abcd2    | ATP-binding cassette sub-family D member 2       | 17.1927       |
| Abhd2    | abhydrolase domain-containing protein 2          | 12.8483       |
| Acacb    | acetyl-CoA carboxylase 2                         | 10.2549       |
| Acad9    | acyl-CoA dehydrogenase family member 9,          | 13.9105       |
| Acadm    | medium-chain specific acyl-CoA dehydrogenase,    | 12.0863       |
| Acadsb   | short/branched chain specific acyl-CoA           | -11.7253      |
| Acbd5    | acyl-CoA-binding domain-containing protein 5     | -11.9797      |
| Acd      | adrenocortical dysplasia protein homolog         | 13.7697       |
| Acer2    | alkaline ceramidase 2                            | 14.2418       |
| Aco1     | cytoplasmic aconitate hydratase                  | -10.4777      |
| Aco2     | aconitate hydratase, mitochondrial precursor     | -8.8057       |
| Acot1    | acyl-coenzyme A thioesterase 1                   | 14.1605       |
| Acp6     | lysophosphatidic acid phosphatase type 6         | -8.3007       |
| Acpp     | prostatic acid phosphatase long isoform          | -11.0523      |
| Acpp     | prostatic acid phosphatase short isoform         | -11.0523      |
| Acs16    | long-chain-fatty-acid--CoA ligase 6              | -17.2029      |
| Actbl2   | beta-actin-like protein 2                        | -14.0503      |
| Actg1    | actin, cytoplasmic 2                             | -15.1316      |
| Actl6b   | actin-like protein 6B                            | 17.0192       |
| Acy1     | aminoacylase-1A                                  | -8.6617       |
| Acy3     | aspartoacylase-2                                 | 11.9872       |
| Adam15   | disintegrin and metalloproteinase                | 8.61          |
| Adamts14 | A disintegrin and metalloproteinase with         | -10.417       |
| Adamts15 | A disintegrin and metalloproteinase with         | 11.454        |
| Adamts7  | A disintegrin and metalloproteinase with         | 13.4034       |
| Adamts9  | A disintegrin and metalloproteinase with         | 11.2067       |
| Adat3    | tRNA-specific adenosine deaminase-like protein   | 19.455        |
| Add1     | alpha-adducin                                    | -14.468       |
| Adipoq   | adiponectin                                      | 12.7349       |
| Adra2b   | alpha-2B adrenergic receptor                     | 8.1516        |
| Aer61    | glycosyltransferase Aer61 precursor              | -9.445        |
| Afap111  | actin filament-associated protein 1-like 1       | -8.6178       |
| Agfg2    | arf-GAP domain and FG repeats-containing protein | -8.5203       |
| Agpat1   | 1-acyl-sn-glycerol-3-phosphate acyltransferase   | -11.1754      |
| Aifm1    | apoptosis-inducing factor 1, mitochondrial       | -13.23        |
| Aifm2    | apoptosis-inducing factor,                       | 9.5185        |
| Aipl1    | aryl-hydrocarbon-interacting protein-like 1      | -15.5769      |
| Akt1s1   | AKT1 substrate 1 (proline-rich)                  | -10.007       |
| Akt1s1   | AKT1 substrate 1 (proline-rich)                  | 9.4611        |

**Differential Methylation in F2**

| GeneName | proteinName                                                    | dif (MAM-SAL) |
|----------|----------------------------------------------------------------|---------------|
| Abhd10   | Abhydrolase Domain Containing 10                               | -11.5         |
| Adam3a   | ADAM metalloproteinase domain 3A (pseudogene)                  | 12.75         |
| Adcy2    | adenylate cyclase 2 (brain)                                    | 13.25         |
| Ajap1    | adherens junctions associated protein 1                        | 29            |
| Akap12   | A kinase (PRKA) anchor protein 12                              | 16            |
| Atp1b1   | ATPase, Na+/K+ transporting, beta 1 polypeptide                | 23.5          |
| Atp6v0d2 | ATPase, H+ transporting, lysosomal 38kDa, V0 subunit d2        | -9.5          |
| Atp9b    | ATPase, class II, type 9B                                      | -23.5         |
| Cd244    | CD244 molecule, natural killer cell receptor 2B4               | 10.25         |
| Cd244    | CD244 molecule, natural killer cell receptor 2B4               | 26.5          |
| Cd96     | CD96 molecule                                                  | 12.25         |
| Cdc27    | cell division cycle 27                                         | -14.75        |
| Cdk6     | cyclin-dependent kinase 6                                      | -29.5         |
| Cdk6     | cyclin-dependent kinase 6                                      | 13.5          |
| Cdk6     | cyclin-dependent kinase 6                                      | 15.5          |
| Cited2   | Cbp/p300-interacting transactivator, with Glu/Asp-rich carboxy | -33.5         |
| Cnrip1   | cannabinoid receptor interacting protein 1                     | -23           |
| Crabp1   | cellular retinoic acid binding protein 1                       | 22            |
| Crybb3   | crystallin, beta B3                                            | 19            |
| Cst3     | cystatin C                                                     | 12.25         |
| Cst3     | cystatin C                                                     | 16.5          |
| Dhx58    | DEXH (Asp-Glu-X-His) box polypeptide 58                        | -12           |
| Dpt      | dermatopontin                                                  | 23.5          |
| Dtwd2    | DTW domain containing 2                                        | -94           |
| Eif1     | eukaryotic translation initiation factor 1                     | -29.25        |
| Eif1     | eukaryotic translation initiation factor 1                     | -22.75        |
| Eif1     | eukaryotic translation initiation factor 1                     | -11.75        |
| Eml4     | echinoderm microtubule associated protein like 4               | 19.75         |
| Ern1     | endoplasmic reticulum to nucleus signaling 1                   | -39.25        |
| Esr1     | estrogen receptor 1                                            | 26.75         |
| Etaa1    | Ewing tumor-associated antigen 1                               | -10           |
| Ets1     | v-ets avian erythroblastosis virus E26 oncogene homolog 1      | 29.25         |
| F2r      | coagulation factor II (thrombin) receptor                      | 39            |
| F2r1     | coagulation factor II (thrombin) receptor-like 1               | 39            |
| Fam107b  | family with sequence similarity 107, member B                  | -23.5         |
| Fam110b  | family with sequence similarity 110, member B                  | 17            |
| Fam76b   | family with sequence similarity 76, member B                   | 31.25         |
| Faslg    | Fas ligand (TNF superfamily, member 6)                         | 23.5          |
| Fbxo48   | F-box protein 48                                               | -10           |
| Foxe3    | forkhead box E3                                                | -9.25         |
| Foxe3    | forkhead box E3                                                | -16           |
| Foxe3    | forkhead box E3                                                | -9            |
| Foxe3    | forkhead box E3                                                | -23.5         |
| Frdm3    | FERM domain containing 3                                       | 10            |
| Frdm3    | FERM domain containing 3                                       | 15.25         |

|          |                                                  |          |
|----------|--------------------------------------------------|----------|
| Alad     | delta-aminolevulinic acid dehydratase            | -13.8856 |
| Aldh3b1  | aldehyde dehydrogenase family 3 member B1        | 12.4445  |
| Aldoa1   | aldolase A-like 1                                | 19.0855  |
| Alg1     | chitobiosyldiphosphodolichol                     | -12.6707 |
| Alg10    | putative alpha-1,2-glucosyltransferase ALG10-B   | -11.2449 |
| Alg5     | dolichyl-phosphate beta-glucosyltransferase      | -15.7068 |
| Alg6     | dolichyl pyrophosphate Man9GlcNAc2               | -12.745  |
| Alox15   | arachidonate 12-lipoxygenase, leukocyte-type     | 9.3796   |
| Aloxe3   | epidermis-type lipoxygenase 3                    | 15.1469  |
| Amelx    | amelogenin, X isoform precursor                  | 12.9285  |
| Ammecr1l | AMMECR1-like protein                             | 11.4317  |
| Amtn     | amelotin precursor                               | 11.9248  |
| Angpt4   | angiopoietin-4                                   | 8.9909   |
| Angptl2  | angiopoietin-related protein 2                   | 20.7624  |
| Ankrd13d | ankyrin repeat domain-containing protein 13D     | -11.7509 |
| Ankrd16  | ankyrin repeat domain-containing protein 16      | 13.4477  |
| Ankrd46  | ankyrin repeat domain-containing protein 46      | 14.689   |
| Anpep    | aminopeptidase N                                 | -13.6233 |
| Anubl1   | AN1-type zinc finger and ubiquitin               | -17.0251 |
| Ap2b1    | AP-2 complex subunit beta                        | -16.2212 |
| Apc2     | adenomatous polyposis coli protein 2             | 9.3611   |
| Apeh     | acylamino-acid-releasing enzyme                  | 12.9433  |
| Apon     | apolipoprotein N                                 | 18.6015  |
| Aqp5     | aquaporin-5                                      | -10.9594 |
| Aqp8     | aquaporin-8                                      | 14.3189  |
| Arf1     | ADP-ribosylation factor 1                        | -10.6388 |
| Arf5     | ADP-ribosylation factor 5                        | -12.3208 |
| Arhgdig  | rho GDP-dissociation inhibitor 3                 | -14.164  |
| Arhgef7  | rho guanine nucleotide exchange factor 7 isoform | 10.2143  |
| Arid4a   | AT-rich interactive domain-containing protein    | -18.5451 |
| Arid4a   | AT-rich interactive domain-containing protein    | 10.57    |
| Arl9     | ADP-ribosylation factor-like protein 9           | 12.155   |
| Armrc6   | armadillo repeat-containing protein 6            | -11.4334 |
| Armrcx3  | armadillo repeat-containing X-linked protein 3   | 8.5024   |
| Armrcx6  | protein ARMRCX6                                  | 8.5024   |
| Arpp19   | cAMP-regulated phosphoprotein 19                 | -15.5409 |
| Arsi     | arylsulfatase I precursor                        | 15.5571  |
| Arsk     | arylsulfatase K precursor                        | -9.9393  |
| Art3     | ecto-ADP-ribosyltransferase 3                    | -13.252  |
| Art5     | ecto-ADP-ribosyltransferase 5 precursor          | 14.2433  |
| Artn     | artemin precursor                                | -9.2675  |
| Asb1     | ankyrin repeat and SOCS box protein 1            | -12.6992 |
| Asb18    | ankyrin repeat and SOCS box-containing 18        | 14.1345  |
| Ascl2    | achaete-scute homolog 2                          | 13.4211  |
| Aste1    | asteroid homolog 1                               | -8.7333  |
| Asz1     | ankyrin repeat, SAM and basic leucine zipper     | 15.3277  |
| Atcay    | caytaxin                                         | -15.7501 |
| Atf6     | cyclic AMP-dependent transcription factor ATF-6  | -8.1694  |

|              |                                                             |        |
|--------------|-------------------------------------------------------------|--------|
| Gad1         | glutamate decarboxylase 1 (brain, 67kDa)                    | -19.25 |
| Gast         | gastrin                                                     | -22.75 |
| Gast         | gastrin                                                     | -11.75 |
| Gin1         | gypsy retrotransposon integrase 1                           | 15.5   |
| Gorasp2      | golgi reassembly stacking protein 2, 55kDa                  | -19.25 |
| Gxylt1       | glucoside xylosyltransferase 1                              | 10.75  |
| Hap1         | huntingtin-associated protein 1                             | -34.75 |
| Hap1         | huntingtin-associated protein 1                             | -13.75 |
| Hepacam2     | HEPACAM family member 2                                     | -29.5  |
| Hepacam2     | HEPACAM family member 2                                     | 13.5   |
| Hepacam2     | HEPACAM family member 2                                     | 15.5   |
| Heph1l1      | hephaestin-like 1                                           | -31    |
| Heph1l1      | hephaestin-like 1                                           | -16.75 |
| Heph1l1      | hephaestin-like 1                                           | -11.25 |
| Hs3st3b1     | heparan sulfate (glucosamine) 3-O-sulfotransferase 3B1      | 11     |
| Hsbp11l1     | heat shock factor binding protein 1-like 1                  | -19.5  |
| Hspb3        | heat shock 27kDa protein 3                                  | -29    |
| Hspb8        | heat shock 22kDa protein 8                                  | 27.75  |
| Ido1         | indoleamine 2,3-dioxygenase 1                               | 12.75  |
| Impad1       | inositol monophosphatase domain containing 1                | 17     |
| Ireb2        | iron-responsive element binding protein 2                   | 22     |
| Itgb3        | integrin, beta 3 (platelet glycoprotein IIIa, antigen CD61) | -14.75 |
| Itln1        | intelectin 1 (galactofuranose binding)                      | 10.25  |
| lyd          | iodotyrosine deiodinase                                     | 13     |
| Jup          | junction plakoglobin                                        | -34.75 |
| Jup          | junction plakoglobin                                        | -13.75 |
| Kcng2        | potassium voltage-gated channel, subfamily G, member 2      | -19.5  |
| Kirrel3      | kin of IRRE like 3 (Drosophila)                             | 29.25  |
| Klhl11       | kelch-like family member 11                                 | -18.75 |
| Klhl14       | kelch-like family member 14                                 | 21.75  |
| Klhl14       | kelch-like family member 14                                 | -49.5  |
| Krt42        | keratin 42 pseudogene                                       | -29.25 |
| LOC100365008 | hypothetical protein                                        | -12.5  |
| LOC306766    | hypothetical protein                                        | 28     |
| LOC310926    | hypothetical protein                                        | -94    |
| LOC689081    | hypothetical protein                                        | 12.25  |
| Lrp10        | low density lipoprotein receptor-related protein 10         | 10.75  |
| Lrriq3       | leucine-rich repeats and IQ motif containing 3              | -14.5  |
| Ly9          | lymphocyte antigen 9                                        | 26.5   |
| Mab21l1      | mab-21-like 1                                               | -26    |
| Maged2       | melanoma antigen family D, 2                                | 11.25  |
| Matn1        | matrilin 1, cartilage matrix protein                        | 15.5   |
| Mettl5       | methyltransferase like 5                                    | 24.25  |
| Mettl5       | methyltransferase like 5                                    | 27.75  |
| Milr1        | mast cell immunoglobulin-like receptor 1                    | -39.25 |
| Mir29b2      | microRNA 29b-2                                              | -40    |
| Mir3556b     | microRNA 3556b                                              | -42    |
| Mir3556b     | microRNA 3556b                                              | 14.75  |

|          |                                                  |          |
|----------|--------------------------------------------------|----------|
| Atg10    | autophagy-related protein 10                     | -9.5283  |
| Atoh8    | protein atonal homolog 8                         | 9.5335   |
| Atp1a2   | sodium/potassium-transporting ATPase subunit     | 17.2844  |
| Atp4b    | potassium-transporting ATPase subunit beta       | 12.1087  |
| Atp5c1   | ATP synthase subunit gamma, mitochondrial        | 9.878    |
| Atp5j    | ATP synthase-coupling factor 6, mitochondrial    | -8.206   |
| Atp6ap1  | V-type proton ATPase subunit S1 precursor        | -9.0519  |
| Atp6v1g1 | V-type proton ATPase subunit G 1                 | -12.4556 |
| Atpif1   | ATPase inhibitor, mitochondrial precursor        | -9.0708  |
| Atxn1    | ataxin-1                                         | -8.8367  |
| Aup1     | ancient ubiquitous protein 1                     | 10.0416  |
| Aven     | cell death regulator Aven                        | 23.0447  |
| Axin2    | axin-2                                           | -16.8263 |
| B3gnt7   | UDP-GlcNAc:betaGal                               | 13.8934  |
| Bad      | bcl2 antagonist of cell death                    | 11.8212  |
| Bag3     | BAG family molecular chaperone regulator 3       | -12.1217 |
| Barx1    | BARX homeobox 1                                  | 12.1285  |
| Bat4     | HLA-B associated transcript 4                    | 9.0531   |
| Bcam     | basal cell adhesion molecule                     | -8.1234  |
| Bcdin3d  | probable methyltransferase BCDIN3D               | 12.8425  |
| Bckdha   | 2-oxoisovalerate dehydrogenase subunit alpha,    | 19.175   |
| Bcl6b    | B-cell CLL/lymphoma 6 member B protein           | -8.3     |
| Bhmt     | betaine--homocysteine S-methyltransferase 1      | 17.9508  |
| Bhmt2    | betaine--homocysteine S-methyltransferase 2      | 18.1526  |
| Blmh     | bleomycin hydrolase                              | -10.6303 |
| Bmf      | bcl-2-modifying factor                           | 10.721   |
| Bmp2     | bone morphogenetic protein 2 precursor           | 10.0033  |
| Bmp4     | bone morphogenetic protein 4 precursor           | -8.8333  |
| Bmpr1a   | bone morphogenetic protein receptor type-1A      | 10.1475  |
| Bola1    | bolA-like protein 1                              | -8.3912  |
| Boll     | protein boule-like                               | 17.056   |
| Bpil2    | bactericidal/permeability-increasing             | 9.542    |
| Bpnt1    | 3'(2'),5'-bisphosphate nucleotidase 1            | 13.8148  |
| Brd2     | bromodomain-containing protein 2                 | -14.4017 |
| Brd2     | bromodomain-containing protein 2                 | -15.3688 |
| Brd7     | bromodomain-containing protein 7                 | -11.2151 |
| Brf2     | transcription factor IIIB 50 kDa subunit         | -13.6226 |
| Bruno6   | CUGBP Elav-like family member 6                  | 13.623   |
| Btc      | probetacellulin                                  | 9.415    |
| Bub3     | budding uninhibited by benzimidazoles 3 homolog  | 13.5424  |
| C8g      | complement component C8 gamma chain              | -9.7855  |
| Cacna2d2 | voltage-dependent calcium channel subunit        | 16.1562  |
| Cacnb3   | voltage-dependent L-type calcium channel subunit | -12.9064 |
| Cacng8   | voltage-dependent calcium channel gamma-8        | -15.7472 |
| Cadm4    | cell adhesion molecule 4 precursor               | 14.0733  |
| Calm3    | calmodulin                                       | 13.5058  |
| Capn8    | calpain-8                                        | 18.3396  |

|            |                                                                              |        |
|------------|------------------------------------------------------------------------------|--------|
| Mllt10     | myeloid/lymphoid or mixed-lineage leukemia; translocated to                  | 20     |
| Mmp14      | matrix metalloproteinase 14 (membrane-inserted)                              | 10.75  |
| Mmp16      | matrix metalloproteinase 16 (membrane-inserted)                              | 11.25  |
| Mthfd1l    | methylenetetrahydrofolate dehydrogenase (NADP+ dependent)                    | 16     |
| Myct1      | myc target 1                                                                 | 26.75  |
| Myo3b      | myosin IIIB                                                                  | 15.5   |
| Ndst4      | N-deacetylase/N-sulfotransferase (heparan glucosaminyl) 4                    | -12.5  |
| Negr1      | neuronal growth regulator 1                                                  | -14.5  |
| Nfatc1     | nuclear factor of activated T-cells, cytoplasmic, calcineurin-dep            | 20.5   |
| Nfatc1     | nuclear factor of activated T-cells, cytoplasmic, calcineurin-dep            | -33.5  |
| Nkiras2    | NFKB inhibitor interacting Ras-like 2                                        | -12    |
| Nol4       | nucleolar protein 4                                                          | 21.75  |
| Nol4       | nucleolar protein 4                                                          | -49.5  |
| Npat       | nuclear protein, ataxia-telangiectasia locus                                 | -19.5  |
| Nphp4      | nephronophthisis 4                                                           | 29     |
| Nt5c3b     | 5'-nucleotidase, cytosolic IIIB                                              | -18.75 |
| Ntf3       | neurotrophin 3                                                               | -11.25 |
| Olr1259    | olfactory receptor 1259                                                      | -29    |
| Olr1455    | olfactory receptor 1455                                                      | 12.25  |
| Oprm1      | opioid receptor, mu 1                                                        | -20.25 |
| P22k15     | cystatin related protein 2                                                   | 16.5   |
| Papd7      | PAP associated domain containing 7                                           | 13.25  |
| Pcdh20     | protocadherin 20                                                             | 10     |
| Pcdh9      | protocadherin 9                                                              | 10     |
| Pdzrn4     | PDZ domain containing ring finger 4                                          | 10.75  |
| Pkdcc      | protein kinase domain containing, cytoplasmic                                | 19.75  |
| Plek       | pleckstrin                                                                   | -23    |
| Plekhg1    | pleckstrin homology domain containing, family G with RhoGef domain) member 1 | 13     |
| Plxdc2     | plexin domain containing 2                                                   | 20     |
| Pmp22      | peripheral myelin protein 22                                                 | 11     |
| Ppip5k2    | diphosphoinositol pentakisphosphate kinase 2                                 | 15.5   |
| Ppp1r14c   | protein phosphatase 1, regulatory (inhibitor) subunit 14C                    | -42    |
| Ppp1r14c   | protein phosphatase 1, regulatory (inhibitor) subunit 14C                    | 14.75  |
| Prdx6      | peroxiredoxin 6                                                              | -11    |
| Prdx6      | peroxiredoxin 6                                                              | -8     |
| Prf1       | perforin 1 (pore forming protein)                                            | -11.75 |
| Prpf18     | pre-mRNA processing factor 18                                                | -23.5  |
| Ptpru      | protein tyrosine phosphatase, receptor type, U                               | 15.5   |
| Rab39a     | RAB39A, member RAS oncogene family                                           | 13     |
| Rai1       | retinoic acid induced 1                                                      | -17    |
| Rasd1      | RAS, dexamethasone-induced 1                                                 | -17    |
| Rbfox1     | RNA binding protein, fox-1 homolog                                           | -8.25  |
| RGD1311251 | similar to RIKEN cDNA 4930550C14                                             | -19.5  |
| RGD1311458 | hypothetical protein MGC27931                                                | 13     |
| Rn5-8s     | 5.8S ribosomal RNA                                                           | -33.5  |
| RT1-A1     | RT1 class Ia, locus A1                                                       | 20     |
| RT1-A2     | RT1 class Ia, locus A2                                                       | 20     |

|         |                                                |          |
|---------|------------------------------------------------|----------|
| Capns2  | calpain small subunit 2                        | 18.0903  |
| Cartpt  | cocaine- and amphetamine-regulated transcript  | 10.7073  |
| Caskin2 | caskin-2                                       | -10.155  |
| Casp3   | caspase-3                                      | -12.97   |
| Casp6   | caspase 6                                      | -13.0759 |
| Casp9   | caspase-9                                      | -14.2467 |
| Cbfa2t3 | protein CBFA2T3                                | 11.6383  |
| Cbl1    | E3 ubiquitin-protein ligase Hakai              | -9.6412  |
| Ccdc103 | coiled-coil domain-containing protein 103      | -8.1116  |
| Ccdc46  | coiled-coil domain-containing protein 46       | 16.7799  |
| Ccdc47  | coiled-coil domain-containing protein 47       | -8.455   |
| Ccdc47  | coiled-coil domain-containing protein 47       | -15.5442 |
| Ccdc82  | coiled-coil domain-containing protein 82       | -11.95   |
| Ccl27   | chemokine (C-C motif) ligand 27                | -11.1283 |
| Ccnd2   | G1/S-specific cyclin-D2                        | 15.2816  |
| Ccnd2   | G1/S-specific cyclin-D2                        | 12.9933  |
| Cd248   | endosialin                                     | -9.0435  |
| Cd38    | ADP-ribosyl cyclase 1                          | 13.8755  |
| Cd3e    | T-cell surface glycoprotein CD3 epsilon chain  | 9.9516   |
| Cd3eap  | DNA-directed RNA polymerase I subunit RPA34    | 8.445    |
| Cd3eap  | DNA-directed RNA polymerase I subunit RPA34    | 9.7033   |
| Cd80    | T-lymphocyte activation antigen CD80           | 8.8253   |
| Cd9     | CD9 antigen                                    | -9.0966  |
| Cd9     | CD9 antigen                                    | -12.8174 |
| Cd99l2  | CD99 antigen-like protein 2                    | -9.2697  |
| Cdan1   | congenital dyserythropoietic anemia, type I    | -10.822  |
| Cdc25b  | M-phase inducer phosphatase 2                  | -12.8968 |
| Cdc37l1 | hsp90 co-chaperone Cdc37-like 1                | -13.6825 |
| Cdh5    | cadherin-5                                     | 15.1739  |
| Cdipt   | CDP-diacylglycerol--inositol                   | 11.4036  |
| Cdk2ap2 | cyclin-dependent kinase 2-associated protein 2 | -12.38   |
| Cdk6    | cell division protein kinase 6                 | -12.8257 |
| Cds2    | phosphatidate cytidyltransferase 2             | -15.0025 |
| Cds2    | phosphatidate cytidyltransferase 2             | -17.438  |
| Cebpa   | CCAAT/enhancer-binding protein alpha           | 16.1843  |
| Cep55   | centrosomal protein of 55 kDa                  | -10.6979 |
| Cept1   | choline/ethanolaminephosphotransferase 1       | -14.22   |
| Ces2    | carboxylesterase 2 isoform 2 precursor         | 8.8761   |
| Cfd     | complement factor D precursor                  | -18.1193 |
| Cfdp1   | craniofacial development protein 1             | 14.0805  |
| Cfi     | complement factor I precursor                  | 15.6082  |
| Chad    | chondroadherin precursor                       | 11.2737  |
| Chdh    | choline dehydrogenase, mitochondrial precursor | -8.7134  |
| Chit1   | chitotriosidase-1                              | 14.3538  |
| Chkb    | choline/ethanolamine kinase                    | 13.8648  |
| Chp     | calcium-binding protein p22                    | -10.0885 |
| Chrm2   | muscarinic acetylcholine receptor M2           | 10.4129  |
| Chrm2   | muscarinic acetylcholine receptor M2           | 10.4129  |

|         |                                                                                          |        |
|---------|------------------------------------------------------------------------------------------|--------|
| Scaf8   | SR-related CTD-associated factor 8                                                       | -20.25 |
| Scd     | stearoyl-CoA desaturase (delta-9-desaturase)                                             | -7.25  |
| Scd1    | stearoyl-CoA desaturase 5                                                                | -7.25  |
| Sesn3   | sestrin 3                                                                                | 31.25  |
| Sgpl1   | sphingosine-1-phosphate lyase 1                                                          | -11.75 |
| Sgsm1   | small G protein signaling modulator 1                                                    | 19     |
| Skint1  | Skint-like, pseudogene                                                                   | -9.25  |
| Skint1  | Skint-like, pseudogene                                                                   | -16    |
| Skint1  | Skint-like, pseudogene                                                                   | -9     |
| Skint1  | Skint-like, pseudogene                                                                   | -23.5  |
| Slc14a2 | solute carrier family 14 (urea transporter), member 2                                    | 20.5   |
| Slc14a2 | solute carrier family 14 (urea transporter), member 2                                    | -33.5  |
| Slc14a2 | solute carrier family 14 (urea transporter), member 2                                    | -23.5  |
| Slc35f2 | solute carrier family 35, member F2                                                      | 13     |
| Slc7a13 | solute carrier family 7 (anionic amino acid transporter), member 13                      | -9.5   |
| Slc9a10 | solute carrier family 9, subfamily C (Na+-transporting carboxylate symporter), member 10 | 12.5   |
| Smco4   | single-pass membrane protein with coiled-coil domains 4                                  | 18.75  |
| Sncb    | synuclein, beta                                                                          | 21     |
| Sp5     | Sp5 transcription factor                                                                 | 24.25  |
| Sp5     | Sp5 transcription factor                                                                 | 27.75  |
| Sp5     | Sp5 transcription factor                                                                 | 15.5   |
| Spag8   | sperm associated antigen 8                                                               | -12.5  |
| Spice1  | spindle and centriole associated protein 1                                               | 13     |
| Tagln3  | transgelin 3                                                                             | -11.5  |
| Taok3   | TAO kinase 3                                                                             | 27.75  |
| Thoc3   | THO complex 3                                                                            | 28     |
| Tle1    | transducin-like enhancer of split 1                                                      | 10     |
| Tle1    | transducin-like enhancer of split 1                                                      | 15.25  |
| Tm4sf1  | transmembrane 4 L six family member 1                                                    | -26    |
| Tmem114 | transmembrane protein 114                                                                | -8.25  |
| Tmprss7 | transmembrane protease, serine 7                                                         | 12.5   |
| Tnfsf4  | tumor necrosis factor (ligand) superfamily, member 4                                     | -11    |
| Tnfsf4  | tumor necrosis factor (ligand) superfamily, member 4                                     | -8     |
| Tnfsf4  | tumor necrosis factor (ligand) superfamily, member 4                                     | 23.5   |
| Tram1l1 | translocation associated membrane protein 1-like 1                                       | -12.5  |
| Tspan17 | tetraspanin 17                                                                           | 21     |
| Vom1r31 | vomer nasal 1 receptor 31                                                                | 18.75  |
| Vstm5   | V-set and transmembrane domain containing 5                                              | -31    |
| Vstm5   | V-set and transmembrane domain containing 5                                              | -16.75 |
| Vstm5   | V-set and transmembrane domain containing 5                                              | -11.25 |
| Vwf     | von Willebrand factor                                                                    | -11.25 |

|          |                                                  |          |
|----------|--------------------------------------------------|----------|
| Chrna10  | neuronal acetylcholine receptor subunit alpha-10 | 14.2433  |
| Chrna5   | neuronal acetylcholine receptor subunit alpha-5  | -9.3844  |
| Chrbn1   | acetylcholine receptor subunit beta precursor    | -10.2159 |
| Chrnd    | acetylcholine receptor subunit delta precursor   | 14.705   |
| Cidea    | cell death-inducing DFFA-like effector a         | -9.9278  |
| Cidec    | cell death activator CIDE-3                      | 10.5517  |
| Cilp2    | cartilage intermediate layer protein 2           | 8.24     |
| Cirbp    | cold-inducible RNA-binding protein               | -17.6506 |
| Cit      | citron Rho-interacting kinase                    | 12.8242  |
| Cit      | citron Rho-interacting kinase                    | -13.4259 |
| Cited4   | cbp/p300-interacting transactivator 4            | -12.25   |
| Ckap4    | cytoskeleton-associated protein 4                | -14.5765 |
| Clasp2   | CLIP-associating protein 2                       | 9.3135   |
| Cldn12   | claudin 12                                       | 18.4937  |
| Cldn22   | claudin-22                                       | 10.3882  |
| Cldn7    | claudin-7                                        | 15.3207  |
| Cldn8    | claudin-8                                        | 18.5303  |
| Cldn9    | claudin-9                                        | -11.9234 |
| Clic3    | chloride intracellular channel 3                 | 20.2275  |
| Clip2    | CAP-Gly domain-containing linker protein 2       | -12.7104 |
| Clps     | colipase precursor                               | 14.0089  |
| Clrn2    | clarin-2                                         | -14.2023 |
| Clrn3    | clarin-3                                         | 17.7015  |
| Clstn2   | calsyntenin-2 precursor                          | 11.16    |
| Cnih4    | protein cornichon homolog 4                      | 8.973    |
| Cnksr1   | connector enhancer of kinase suppressor of ras   | 11.3016  |
| Coasy    | bifunctional coenzyme A synthase                 | 11.9917  |
| Coil     | coilin                                           | -10.4144 |
| Col2a1   | collagen alpha-1(II) chain precursor             | 12.8077  |
| Col4a3bp | collagen type IV alpha-3-binding protein         | 14.9771  |
| Col9a2   | collagen alpha-2(IX) chain                       | 19.2557  |
| Col9a2   | collagen alpha-2(IX) chain                       | 19.2118  |
| Colq     | acetylcholinesterase collagenic tail peptide     | 8.1323   |
| Comm6    | COMM domain-containing protein 6                 | -16.9651 |
| Cope     | coatamer subunit epsilon                         | -9.4143  |
| Cops5    | COP9 signalosome complex subunit 5               | -8.7421  |
| Cops6    | COP9 signalosome complex subunit 6               | -15.7645 |
| Coq4     | ubiquinone biosynthesis protein COQ4 homolog,    | -14.6102 |
| Coro1a   | coronin-1A                                       | 16.3281  |
| Coro7    | coronin-7                                        | 11.1566  |
| Cox5b    | cytochrome c oxidase subunit 5B, mitochondrial   | 15.2275  |
| Cox7a2l  | cytochrome c oxidase subunit VIIa polypeptide 2  | 11.6957  |
| Cpeb1    | cytoplasmic polyadenylation element-binding      | 8.9133   |
| Cpne3    | copine-3                                         | -14.5053 |
| Cpne7    | copine-7                                         | -10.4988 |
| Cpt1b    | carnitine O-palmitoyltransferase 1, muscle       | 13.8648  |
| Cpz      | carboxypeptidase Z precursor                     | -13.5418 |
| Crebl2   | cAMP-responsive element-binding protein-like 2   | -13.8786 |

|             |                                               |          |
|-------------|-----------------------------------------------|----------|
| Crh         | corticoliberin precursor                      | -13.2007 |
| Crlf1       | cytokine receptor-like factor 1               | -12.429  |
| Crlf1       | cytokine receptor-like factor 1               | -11.6817 |
| Crygb       | gamma-crystallin B                            | 9.9099   |
| Crygd       | gamma-crystallin D                            | 10.5397  |
| Cryz        | quinone oxidoreductase                        | -9.1072  |
| Csgalnact1  | chondroitin sulfate                           | 11.6587  |
| Csgalnact2  | chondroitin sulfate                           | 11.275   |
| Csn1s1      | alpha-S1-casein precursor                     | 17.2521  |
| Csrnp1      | cysteine/serine-rich nuclear protein 1        | 21.5925  |
| Csrp1       | cysteine and glycine-rich protein 1           | 23.4048  |
| Csrp2       | cysteine and glycine-rich protein 2           | 9.9645   |
| Cst6        | cystatin-M                                    | -9.3338  |
| Cstf2t      | cleavage stimulation factor subunit 2 tau     | 12.5222  |
| Ctdp1       | RNA polymerase II subunit A C-terminal domain | 11.4861  |
| Ctps2       | CTP synthase 2                                | 11.1617  |
| Ctsw        | cathepsin W                                   | -12.765  |
| Cttn        | cortactin isoform B                           | -11.8417 |
| Cttnbp2nl   | CTTNBP2 N-terminal like                       | -10.4033 |
| Cuta        | protein CutA isoform 2                        | -13.1403 |
| Cuta        | protein CutA isoform 2                        | -13.1403 |
| Cuta        | protein CutA isoform 1                        | -13.1403 |
| Cxcl11      | C-X-C motif chemokine 11                      | 16.9313  |
| Cxcl17      | VEGF co-regulated chemokine 1                 | 14.5152  |
| Cxcl9       | C-X-C motif chemokine 9                       | -13.252  |
| Cxcr7       | C-X-C chemokine receptor type 7               | -10.7936 |
| Cxxc4       | CXXC-type zinc finger protein 4               | -14.8394 |
| Cyb5r3      | NADH-cytochrome b5 reductase 3                | -14.2766 |
| Cyba        | cytochrome b-245 light chain                  | 18.6526  |
| Cyp1a1      | cytochrome P450 1A1                           | -10.8916 |
| Cyp24a1     | 1,25-dihydroxyvitamin D(3) 24-hydroxylase,    | 9.0285   |
| Cyp26a1     | cytochrome P450, family 26, subfamily a,      | -11.66   |
| Cyp2s1      | cytochrome P450 2S1                           | -15.4008 |
| Cyp3a23/3a1 | cytochrome P450 3A1                           | 14.8145  |
| Cyp4f5      | cytochrome P450 4F5                           | -14.497  |
| Cyth2       | cytohesin-2                                   | -15.1706 |
| Cytsb       | cytospin-B                                    | 14.355   |
| D2hgdh      | D-2-hydroxyglutarate dehydrogenase,           | -8.3178  |
| Dab2ip      | disabled homolog 2-interacting protein        | -14.5141 |
| Dagla       | sn1-specific diacylglycerol lipase alpha      | -8.52    |
| Dapk1       | death-associated protein kinase 1             | -9.1483  |
| Dars        | aspartyl-tRNA synthetase, cytoplasmic         | -10.4425 |
| Dbp         | D site-binding protein                        | 20.153   |
| Dcaf15      | DDB1- and CUL4-associated factor 15           | 8.0515   |
| Dcaf4       | DDB1- and CUL4-associated factor 4            | 12.7866  |
| Dcc         | netrin receptor DCC                           | -11.7827 |
| Dck         | deoxycytidine kinase                          | -16.9412 |
| Dck         | deoxycytidine kinase                          | -15.2423 |

|               |                                                  |          |
|---------------|--------------------------------------------------|----------|
| Dctn3         | dynactin 3                                       | -14.7878 |
| Ddx39         | ATP-dependent RNA helicase DDX39                 | -10.0483 |
| Ddx42         | ATP-dependent RNA helicase DDX42                 | -8.455   |
| Ddx42         | ATP-dependent RNA helicase DDX42                 | -15.5442 |
| Ddx49         | DEAD (Asp-Glu-Ala-Asp) box polypeptide 49        | -9.4143  |
| Depdc7        | DEP domain-containing protein 7                  | 14.7491  |
| Dgcr2         | integral membrane protein DGCR2/IDD              | -11.8887 |
| Dgcr6         | protein DGCR6                                    | 13.3213  |
| Dhh           | desert hedgehog                                  | -10.8455 |
| Dhodh         | dihydroorotate dehydrogenase, mitochondrial      | 22.8677  |
| Dhrsx         | dehydrogenase/reductase (SDR family) X-linked    | -9.215   |
| Dhx36         | probable ATP-dependent RNA helicase DHX36        | 8.7496   |
| Dhx8          | ATP-dependent RNA helicase DHX8                  | 16.0142  |
| Dio1          | type I iodothyronine deiodinase                  | 15.5147  |
| Disp1         | protein dispatched homolog 1                     | 10.59    |
| Disp2         | protein dispatched homolog 2                     | 10.6939  |
| Dmgdh         | dimethylglycine dehydrogenase, mitochondrial     | 18.1526  |
| Dmrtc1c       | DMRT-like family C1c                             | 16.2115  |
| Dmtf1         | cyclin-D-binding Myb-like transcription factor   | -11.5672 |
| Dnaja3        | dnaJ homolog subfamily A member 3, mitochondrial | 11.1566  |
| Dnajc10       | dnaJ homolog subfamily C member 10 precursor     | -12.068  |
| Dnajc16       | dnaJ homolog subfamily C member 16 precursor     | -14.2467 |
| Dnajc4        | dnaJ homolog subfamily C member 4                | -12.2243 |
| Dnajc5g       | dnaJ homolog subfamily C member 5G               | 15.1881  |
| Dnajc8        | dnaJ homolog subfamily C member 8                | -9.0708  |
| Dnase1l1      | deoxyribonuclease-1-like 1 precursor             | 10.34    |
| Dpqr1         | diffuse panbronchiolitis critical region 1       | 8.9811   |
| Dpf1          | zinc finger protein neuro-d4                     | -12.6478 |
| Dph1          | diphthamide biosynthesis protein 1               | -13.0947 |
| Dpp7          | dipeptidyl peptidase 2 precursor                 | -9.7125  |
| Dpy30         | protein dpy-30 homolog                           | 12.7698  |
| Dpy30         | protein dpy-30 homolog                           | 12.7698  |
| Dpys4         | dihydropyrimidinase-related protein 4            | -10.6813 |
| Dqx1          | ATP-dependent RNA helicase DQX1                  | 10.0416  |
| Dram2         | DNA damage-regulated autophagy modulator protein | -14.22   |
| Dtd1          | D-tyrosyl-tRNA(Tyr) deacylase 1                  | -8.7916  |
| Dtwd1         | DTW domain-containing protein 1                  | 11.485   |
| Dtwd1         | DTW domain-containing protein 1                  | 10.7883  |
| Dusp9         | dual specificity protein phosphatase 9           | 16.7915  |
| Dyrk1a        | dual specificity                                 | 8.9088   |
| Dysfip1       | dysferlin-interacting protein 1                  | -15.7477 |
| E030032D13Rik | surfactant associated protein G                  | 8.9811   |
| E2f3          | transcription factor E2F3                        | -14.9673 |
| Ece2          | endothelin-converting enzyme 2                   | -12.3277 |
| Edn3          | endothelin-3 precursor                           | -11.4336 |
| Eef1g         | elongation factor 1-gamma                        | -12.5642 |
| Efemp2        | EGF-containing fibulin-like extracellular matrix | -12.765  |
| Efhc1         | EF-hand domain (C-terminal) containing 1         | -11.9165 |

|          |                                                  |          |
|----------|--------------------------------------------------|----------|
| Efhd2    | EF-hand domain-containing protein D2             | -11.1307 |
| Efna1    | ephrin-A1 precursor                              | 17.681   |
| Efna2    | ephrin A2                                        | 21.0213  |
| Efnb3    | ephrin B3                                        | -13.7667 |
| Egfl8    | epidermal growth factor-like protein 8 isoform   | 10.417   |
| Egfl8    | epidermal growth factor-like protein 8 isoform   | 10.417   |
| Eif2a    | eukaryotic translation initiation factor 2A      | -10.4788 |
| Eif2ak4  | eukaryotic translation initiation factor 2-alpha | -14.2333 |
| Eif2b3   | translation initiation factor eIF-2B subunit     | -15.9589 |
| Eif3c    | eukaryotic translation initiation factor 3       | -14.6368 |
| Eif3k    | eukaryotic translation initiation factor 3       | 10.85    |
| Eif4b    | eukaryotic translation initiation factor 4B      | -13.3281 |
| Elf5     | ETS-related transcription factor Elf-5           | 11.2799  |
| Eme1     | crossover junction endonuclease EME1             | -19.4205 |
| Emilin3  | elastin microfibril interfacier 3                | 14.9539  |
| Eml2     | echinoderm microtubule-associated protein-like   | -15.0511 |
| Entpd3   | ectonucleoside triphosphate diphosphohydrolase   | 10.3034  |
| Epha1    | ephrin type-A receptor 1                         | 14.9267  |
| Epha2    | ephrin type-A receptor 2                         | -14.4656 |
| ErbB3    | receptor tyrosine-protein kinase erbB-3          | -12.8281 |
| Erc1     | ELKS/Rab6-interacting/CAST family member 1       | 10.8717  |
| Espn     | espin                                            | 12.674   |
| Esr2     | estrogen receptor beta                           | 12.5412  |
| Ethe1    | protein ETHE1, mitochondrial                     | -8.035   |
| Ets1     | protein C-ets-1                                  | 12.4511  |
| Etv4     | ETS translocation variant 4                      | -12.9308 |
| Exd1     | exonuclease 3'-5' domain-containing protein 1    | -10.0885 |
| Exosc5   | exosome complex exonuclease RRP46                | 19.175   |
| Exosc8   | exosome complex exonuclease RRP43                | -15.7068 |
| Fabp2    | fatty acid-binding protein, intestinal           | 11.4359  |
| Fabp4    | fatty acid-binding protein, adipocyte            | 11.748   |
| Fabp6    | gastrotropin                                     | 8.7332   |
| Fam108a1 | abhydrolase domain-containing protein FAM108A    | -14.3626 |
| Fam110b  | hypothetical protein LOC500400                   | 9.299    |
| Fam120b  | constitutive coactivator of peroxisome           | -10.0517 |
| Fam158a  | hypothetical protein LOC290224                   | -17.5832 |
| Fam163a  | family with sequence similarity 163, member A    | 14.8019  |
| Fam174a  | membrane protein FAM174A precursor               | 15.5025  |
| Fam195b  | hypothetical protein LOC360677                   | -15.7477 |
| Fam20a   | family with sequence similarity 20, member A     | -13.5018 |
| Fam20c   | dentin matrix protein 4                          | -13.4213 |
| Fam43a   | family with sequence similarity 43, member A     | 11.9242  |
| Fam48a   | family with sequence similarity 48, member A     | -12.0944 |
| Fam64a   | family with sequence similarity 64, member A     | -15.5769 |
| Fam72a   | hypothetical protein LOC681249                   | -15.771  |
| Fam82b   | regulator of microtubule dynamics protein 1      | -14.5053 |
| Fam96b   | family with sequence similarity 96, member B     | -13.8691 |
| Fanca    | Fanconi anemia, complementation group A          | -13.6556 |



|         |                                                  |          |
|---------|--------------------------------------------------|----------|
| Fastk   | fas-activated serine/threonine kinase            | -9.6875  |
| Fastkd1 | FAST kinase domain-containing protein 1          | 20.1356  |
| Fbxl15  | F-box only protein 37                            | 11.88    |
| Fbxo18  | F-box only protein 18                            | 13.4477  |
| Fbxo2   | F-box only protein 2                             | 11.451   |
| Fbxo2   | F-box only protein 2                             | -9.8634  |
| Fbxo44  | F-box only protein 44                            | 11.451   |
| Fbxo44  | F-box only protein 44                            | -9.8634  |
| Fbxo44  | F-box only protein 44                            | 19.2561  |
| Fbxw5   | F-box/WD repeat-containing protein 5             | -9.7855  |
| Fdxr    | NADPH:adrenodoxin oxidoreductase, mitochondrial  | -9.82    |
| Fgf11   | fibroblast growth factor 11                      | -10.2159 |
| Fgf17   | fibroblast growth factor 17 precursor            | -14.8572 |
| Fgf20   | fibroblast growth factor 20                      | 9.0438   |
| Fgf3    | fibroblast growth factor 3                       | 16.0867  |
| Fgfr1   | basic fibroblast growth factor receptor 1        | 9.3243   |
| Fgfr3   | fibroblast growth factor receptor 3              | -13.676  |
| Fhl1    | four and a half LIM domains protein 1 isoform 2  | 8.4838   |
| Fhod1   | FH1/FH2 domain-containing protein 1              | -10.2909 |
| Fibin   | fin bud initiation factor homolog precursor      | 14.0148  |
| Figf    | vascular endothelial growth factor D precursor   | 9.1868   |
| Fiz1    | flt3-interacting zinc finger protein 1           | -12.7083 |
| Fktn    | fukutin                                          | 9.0558   |
| Flot1   | flotillin-1                                      | -12.3661 |
| Foxm1   | forkhead box protein M1                          | -10.7406 |
| Fscn3   | fascin-3                                         | -12.3208 |
| Fstl3   | folliculin-related protein 3 precursor           | -12.6172 |
| Ftsjd1  | ftsJ methyltransferase domain-containing protein | -10.074  |
| G3bp2   | ras GTPase-activating protein-binding protein 2  | 13.2205  |
| G7c     | protein G7c precursor                            | 12.7037  |
| Gabpa   | GA-binding protein alpha chain                   | -8.206   |
| Gabra1  | gamma-aminobutyric acid receptor subunit alpha-1 | 15.1548  |
| Gabre   | gamma-aminobutyric acid receptor subunit         | -10.5908 |
| Gabrp   | gamma-aminobutyric acid receptor subunit pi      | 13.0966  |
| Gal     | galanin preproprotein                            | 9.8441   |
| Gal3st4 | galactose-3-O-sulfotransferase 4                 | 8.79     |
| Galnt14 | putative polypeptide                             | 18.4327  |
| Ganab   | neutral alpha-glucosidase AB                     | -8.3917  |
| Gar1    | H/ACA ribonucleoprotein complex subunit 1        | 15.6082  |
| Gas6    | growth arrest-specific protein 6 precursor       | 10.0716  |
| Gbf1    | Golgi-specific brefeldin A-resistance guanine    | 13.736   |
| Gcom1   | GRINL1A complex locus protein 1                  | -13.5576 |
| Gdap111 | ganglioside-induced differentiation-associated   | 9.9368   |
| Gdi1    | rab GDP dissociation inhibitor alpha             | -9.0519  |
| Gfra3   | GDNF family receptor alpha-3                     | 10.0296  |
| Gfra4   | GDNF family receptor alpha-4                     | 10.908   |
| Ghitm   | growth hormone-inducible transmembrane protein   | -8.9357  |
| Ghrl    | appetite-regulating hormone preproprotein        | 12.3188  |

|        |                                                  |          |
|--------|--------------------------------------------------|----------|
| Gin1   | gypsy retrotransposon integrase-like protein 1   | -11.7019 |
| Gipc1  | PDZ domain-containing protein GIPC1              | 11.8044  |
| Git1   | ARF GTPase-activating protein GIT1               | -15.7483 |
| Git1   | ARF GTPase-activating protein GIT1               | 10.2418  |
| Git1   | ARF GTPase-activating protein GIT1               | -8.8654  |
| Gjb6   | gap junction beta-6 protein                      | 9.5782   |
| Glb1l  | galactosidase, beta 1-like                       | 13.2294  |
| Gle1   | nucleoporin GLE1                                 | -9.746   |
| Gm2a   | ganglioside GM2 activator                        | -9.7925  |
| Gmfg   | glia maturation factor gamma                     | 9.9879   |
| Gmppa  | mannose-1-phosphate guanyltransferase alpha      | 9.7133   |
| Gna14  | guanine nucleotide-binding protein subunit       | 10.9637  |
| Gnai2  | guanine nucleotide-binding protein G(i) subunit  | -11.0774 |
| Gnb2   | guanine nucleotide-binding protein               | -10.3    |
| Gnrhr  | gonadotropin-releasing hormone receptor          | 10.191   |
| Golga3 | Golgin subfamily A member 3                      | -11.3525 |
| Gopc   | golgi associated PDZ and coiled-coil motif       | -8.36    |
| Got1   | aspartate aminotransferase, cytoplasmic          | -9.6923  |
| Gpc2   | glypican-2 precursor                             | 8.79     |
| Gpcpd1 | putative glycerophosphocholine phosphodiesterase | -10.6867 |
| Gper   | G-protein coupled estrogen receptor 1            | 16.1186  |
| Gpr12  | G-protein coupled receptor 12                    | 10.84    |
| Gpr12  | G-protein coupled receptor 12                    | 10.84    |
| Gpr137 | integral membrane protein GPR137                 | 11.8212  |
| Gpr146 | probable G-protein coupled receptor 146          | -12.2366 |
| Gpr15  | G-protein coupled receptor 15                    | 21.8174  |
| Gpr157 | probable G-protein coupled receptor 157          | -9.7817  |
| Gpr173 | probable G-protein coupled receptor 173          | 13.5497  |
| Gpr44  | G protein-coupled receptor 44                    | -11.2358 |
| Gpr68  | ovarian cancer G-protein coupled receptor 1      | 15.0089  |
| Gpr88  | probable G-protein coupled receptor 88           | -10.2457 |
| Gpx7   | glutathione peroxidase 7                         | -11.0298 |
| Grem1  | gremlin-1 precursor                              | 11.0741  |
| Grid2  | glutamate receptor delta-2 subunit precursor     | -14.7307 |
| Grin2a | glutamate [NMDA] receptor subunit epsilon-1      | 12.1992  |
| Grin2b | glutamate [NMDA] receptor subunit epsilon-2      | -14.4484 |
| Grm2   | metabotropic glutamate receptor 2 precursor      | -8.505   |
| Grrp1  | glycine/arginine-rich protein 1                  | 15.5726  |
| Gspt1  | eukaryotic peptide chain release factor          | -11.7734 |
| Gstcd  | glutathione S-transferase C-terminal             | -8.8008  |
| Gtf2h2 | general transcription factor IIH subunit 2       | 16.7766  |
| Gtf3c6 | general transcription factor 3C polypeptide 6    | -9.8065  |
| Guca1b | guanylyl cyclase-activating protein 2            | -21.173  |
| Gucy2c | heat-stable enterotoxin receptor precursor       | 18.5323  |
| Gucy2d | olfactory guanylyl cyclase GC-D precursor        | -12.2568 |
| Gys2   | glycogen [starch] synthase, liver                | 9.3202   |
| Gzmm   | granzyme M                                       | -11.48   |
| H1fnt  | testis-specific H1 histone                       | 11.9443  |

|           |                                                 |          |
|-----------|-------------------------------------------------|----------|
| Hagl      | hydroxyacylglutathione hydrolase-like           | 20.2712  |
| Hapln3    | hyaluronan and proteoglycan link protein 3      | -12.6817 |
| Harbi1    | putative nuclease HARBI1                        | 15.9005  |
| Hat1      | histone acetyltransferase type B catalytic      | -9.9555  |
| Hdac3     | histone deacetylase 3                           | -11.8654 |
| Heca      | headcase protein homolog                        | 10.4364  |
| Hes2      | transcription factor HES-2                      | 12.674   |
| Hes7      | transcription factor HES-7                      | 15.1469  |
| Hexa      | beta-hexosaminidase subunit alpha precursor     | 12.0717  |
| Hif1an    | hypoxia-inducible factor 1-alpha inhibitor      | -15.9521 |
| Hist1h2aa | histone H2A type 4                              | 13.8563  |
| Hist1h2ba | histone H2B type 1-A                            | 13.8563  |
| Hn1l      | hematological and neurological expressed 1-like | -10.9217 |
| Hnrnpa3   | heterogeneous nuclear ribonucleoprotein A3      | 22.1035  |
| Hnrnpab   | heterogeneous nuclear ribonucleoprotein A/B     | -10.4537 |
| Hnrnpf    | heterogeneous nuclear ribonucleoprotein F       | -9.09    |
| Hnrnpf    | heterogeneous nuclear ribonucleoprotein F       | -9.545   |
| Hnrnpf    | heterogeneous nuclear ribonucleoprotein F       | -9.545   |
| Hnrpd     | heterogeneous nuclear ribonucleoprotein D0      | -15.8102 |
| Hnrpm     | heterogeneous nuclear ribonucleoprotein M       | -8.2734  |
| Hoxa10    | homeo box A10                                   | -11.568  |
| Hoxa9     | homeobox protein Hox-A7                         | -13.0178 |
| Hoxb7     | homeobox protein Hox-B7                         | 15.7984  |
| Hoxb8     | homeobox protein Hox-B8                         | 15.7984  |
| Hrk       | activator of apoptosis harakiri                 | 13.4584  |
| Hsd17b1   | estradiol 17-beta-dehydrogenase 1               | 11.9917  |
| Hsd17b10  | 3-hydroxyacyl-CoA dehydrogenase type-2          | -13.2072 |
| Hsd17b8   | estradiol 17-beta-dehydrogenase 8               | 9.8722   |
| Hsd17b8   | estradiol 17-beta-dehydrogenase 8               | -8.9802  |
| Hspa8     | heat shock cognate 71 kDa protein               | -10.0975 |
| Hspa8     | heat shock cognate 71 kDa protein               | -13.2347 |
| Htr5a     | 5-hydroxytryptamine receptor 5A                 | -14.3789 |
| Htr7      | 5-hydroxytryptamine receptor 7                  | -13.2085 |
| Htra2     | serine protease HTRA2, mitochondrial            | 10.0416  |
| Iapp      | islet amyloid polypeptide precursor             | 11.5028  |
| Iars      | isoleucyl-tRNA synthetase, cytoplasmic          | 15.4599  |
| Ier3      | immediate early response 3                      | -12.3661 |
| Ifngr1    | interferon gamma receptor 1                     | -9.8424  |
| Ifnk      | interferon kappa                                | 11.0533  |
| Ift74     | intraflagellar transport protein 74 homolog     | -8.2974  |
| Ift80     | intraflagellar transport protein 80 homolog     | 17.6405  |
| Igf2      | insulin-like growth factor II isoform 2         | -12.395  |
| Igf2      | insulin-like growth factor II isoform 2         | -12.395  |
| Igf2      | insulin-like growth factor II isoform 1         | -12.395  |
| Igfbp2    | insulin-like growth factor-binding protein 2    | -12.6118 |
| Igfbp6    | insulin-like growth factor-binding protein 6    | 11.9906  |
| Igsf8     | immunoglobulin superfamily member 8             | 8.3083   |
| Ikzf3     | zinc finger protein Aiolos                      | 11.2856  |

|         |                                                  |          |
|---------|--------------------------------------------------|----------|
| lkzf5   | zinc finger protein Pegasus                      | -11.7253 |
| Il13ra1 | interleukin-13 receptor subunit alpha-1          | 10.7378  |
| Il13ra1 | interleukin-13 receptor subunit alpha-1          | 8.4275   |
| Il17rb  | interleukin-17 receptor B                        | -8.7134  |
| Il4ra   | interleukin-4 receptor subunit alpha precursor   | -11.6633 |
| Immt    | mitochondrial inner membrane protein             | -11.2    |
| Inhbe   | inhibin beta E chain precursor                   | 16.2284  |
| Inpp5a  | inositol polyphosphate-5-phosphatase A           | 9.1735   |
| Inpp1   | phosphatidylinositol-3,4,5-trisphosphate         | -10.6217 |
| Ins2    | insulin-2 preproprotein                          | 16.1987  |
| Ins13   | insulin-like 3 precursor                         | 10.2781  |
| Ints12  | integrator complex subunit 12                    | -8.8008  |
| Ints5   | integrator complex subunit 5                     | -8.3917  |
| lpo13   | importin-13                                      | -11.3243 |
| lpo4    | importin-4                                       | 13.885   |
| lqsec3  | IQ motif and SEC7 domain-containing protein 3    | -11.7075 |
| lqub    | IQ and ubiquitin-like domain-containing protein  | 13.4657  |
| Irf5    | interferon regulatory factor 5                   | 10.5507  |
| Irf7    | interferon regulatory factor 7                   | -10.6184 |
| Irx3    | iroquois-class homeodomain protein IRX-3         | -11.3725 |
| Iscu    | iron-sulfur cluster assembly enzyme ISCU,        | -15.5598 |
| Itfg1   | T-cell immunomodulatory protein precursor        | 13.9479  |
| Itgb6   | integrin beta-6 precursor                        | 11.6372  |
| ltp2    | inositol 1,4,5-trisphosphate receptor type 2     | -19.4436 |
| Jak3    | tyrosine-protein kinase JAK3                     | 9.9883   |
| Jrkl    | jerky protein homolog-like                       | -11.95   |
| Jun     | transcription factor AP-1                        | 11.5566  |
| Kat3    | kynurenine--oxoglutarate transaminase 3          | 9.0366   |
| Kbtbd10 | kelch repeat and BTB domain-containing protein   | 15.4132  |
| Kbtbd7  | kelch repeat and BTB (POZ) domain containing 7   | 15.1377  |
| Kbtbd8  | kelch repeat and BTB domain-containing protein   | -16.8795 |
| Kcnab1  | voltage-gated potassium channel subunit beta-1   | 9.8276   |
| Kcnab1  | voltage-gated potassium channel subunit beta-1   | 14.8723  |
| Kcnc2   | potassium voltage-gated channel subfamily C      | -12.8503 |
| Kcnc2   | potassium voltage-gated channel subfamily C      | -12.8503 |
| Kcnf1   | potassium voltage-gated channel, subfamily F,    | 8.8487   |
| Kcng1   | potassium voltage-gated channel subfamily G      | 11.9837  |
| Kcnj1   | ATP-sensitive inward rectifier potassium channel | 11.2512  |
| Kcnj3   | G protein-activated inward rectifier potassium   | -9.1189  |
| Kcnk4   | potassium channel subfamily K member 4           | 11.8212  |
| Kcnmb3  | calcium-activated potassium channel subunit      | 11.3455  |
| Kcnv2   | potassium voltage-gated channel subfamily V      | 12.4082  |
| Kctd15  | potassium channel tetramerisation domain         | 10.5929  |
| Kctd5   | BTB/POZ domain-containing protein KCTD5          | 12.8183  |
| Kdm4a   | lysine-specific demethylase 4A                   | 16.2793  |
| Khk     | ketoheokinase                                    | -12.7455 |
| Kif26b  | kinesin family member 26B                        | -9.48    |
| Kif3c   | kinesin-like protein KIF3C                       | 12.6711  |

|           |                                                  |          |
|-----------|--------------------------------------------------|----------|
| Kif5c     | kinesin heavy chain isoform 5C                   | 20.5557  |
| Kin       | DNA/RNA-binding protein KIN17                    | 9.878    |
| Kl        | klotho precursor                                 | 10.3434  |
| Klc4      | kinesin light chain 4                            | 16.3429  |
| Klf16     | Krueppel-like factor 16                          | -10.8575 |
| Klhdc3    | kelch domain-containing protein 3                | -11.4041 |
| Kpna2     | importin subunit alpha-2                         | -12.8258 |
| Krt23     | keratin, type I cytoskeletal 23                  | 19.5968  |
| Krt25     | keratin, type I cytoskeletal 25                  | 14.5889  |
| Krt27     | keratin, type I cytoskeletal 27                  | 14.814   |
| Lamp2     | lysosome-associated membrane glycoprotein 2      | -11.9988 |
| Large     | glycosyltransferase-like protein LARGE1          | -17.7131 |
| Lat2      | linker for activation of T-cells family member   | 9.7263   |
| Lca5l     | Lebercilin-like protein                          | -8.7698  |
| Lcn12     | epididymal-specific lipocalin-12                 | -9.7855  |
| Ldha      | L-lactate dehydrogenase A chain                  | -18.8794 |
| Lepr      | leptin receptor precursor                        | -10.3108 |
| Leprot    | leptin receptor gene-related protein             | -10.3108 |
| Leprot1   | leptin receptor overlapping transcript-like 1    | 9.7408   |
| Lgr5      | leucine-rich repeat-containing G-protein coupled | -12.5974 |
| Lig1      | DNA ligase 1 isoform 2                           | -12.3983 |
| Lig1      | DNA ligase 1 isoform 1                           | -12.3983 |
| Lime1     | lck-interacting transmembrane adapter 1          | 9.5043   |
| Lin7c     | protein lin-7 homolog C                          | -14.0833 |
| Lipc      | hepatic triacylglycerol lipase precursor         | 17.3172  |
| Lipf      | gastric triacylglycerol lipase precursor         | 13.2224  |
| Lipi      | lipase member I                                  | 11.03    |
| Lix1l     | LIX1-like protein                                | -9.1861  |
| Llg1      | lethal(2) giant larvae protein homolog 1         | -11.2217 |
| Lmf2      | lipase maturation factor 2                       | -14.5792 |
| Lmf2      | lipase maturation factor 2                       | -13.2722 |
| Lmo4      | LIM domain transcription factor LMO4             | 14.8685  |
| LOC293103 | lethal, Chr 7, Rinchik 6                         | -10.7485 |
| LOC301289 | hypothetical protein LOC301289                   | 20.264   |
| LOC302495 | RAP2C, member of RAS oncogene family             | 17.6908  |
| LOC304131 | TAK1-like protein                                | -13.2456 |
| LOC305076 | digestive organ expansion factor homolog         | 11.5389  |
| LOC361635 | hypothetical protein LOC361635                   | -12.0673 |
| LOC361776 | hypothetical protein LOC361776                   | 21.9642  |
| LOC361990 | Friend of PRMT1 protein                          | -12.7341 |
| LOC367975 | hypothetical protein LOC367975                   | 13.9269  |
| LOC367994 | hypothetical protein LOC367994                   | 11.1644  |
| LOC498063 | hypothetical protein LOC498063                   | 12.42    |
| LOC498063 | hypothetical protein LOC498063                   | 15.541   |
| LOC499331 | hypothetical protein LOC499331                   | -8.4534  |
| LOC499407 | hypothetical protein LOC499407                   | 12.3381  |
| LOC499418 | hypothetical protein LOC499418                   | 13.7556  |
| LOC499584 | hypothetical protein LOC499584                   | 10.0097  |

|           |                                                |          |
|-----------|------------------------------------------------|----------|
| LOC499719 | hypothetical protein LOC499719                 | 11.6766  |
| LOC499980 | coiled-coil domain-containing protein 146      | 13.8482  |
| LOC500028 | hypothetical protein LOC500028                 | -14.1202 |
| LOC500028 | hypothetical protein LOC500028                 | 20.907   |
| LOC500034 | hypothetical protein LOC500034                 | -11.7046 |
| LOC500118 | hypothetical protein LOC500118                 | 12.1696  |
| LOC500124 | hypothetical protein LOC500124                 | -15.4345 |
| LOC500227 | hypothetical protein LOC500227                 | -12.4088 |
| LOC500475 | hypothetical protein LOC500475                 | -13.8856 |
| LOC500705 | EF-hand domain-containing protein C14orf143    | -13.5054 |
| LOC606294 | KIF1-binding protein                           | 14.212   |
| LOC679805 | hypothetical protein LOC679805                 | -8.2065  |
| LOC680489 | hypothetical protein LOC680489                 | -12.3737 |
| LOC681578 | E3 ubiquitin-protein ligase RNF13              | -15.399  |
| LOC685391 | hypothetical protein LOC685391                 | 17.1254  |
| LOC685406 | hypothetical protein LOC685406                 | 14.75    |
| LOC686031 | hypothetical protein LOC686031                 | 10.0707  |
| LOC688553 | hypothetical protein LOC688553                 | 10.7252  |
| LOC689226 | hypothetical protein LOC689226                 | -9.7605  |
| LOC690435 | hypothetical protein LOC690435                 | 18.3508  |
| LOC690871 | hypothetical protein LOC690871                 | -10.89   |
| LOC691153 | hypothetical protein LOC691153                 | -10.5883 |
| Lonp2     | lon protease homolog 2, peroxisomal            | -11.9883 |
| Loxl4     | lysyl oxidase homolog 4                        | -11.5823 |
| Lpo       | lactoperoxidase                                | 10.7703  |
| Lrp1b     | low density lipoprotein-related protein 1B     | 10.5538  |
| Lrpap1    | alpha-2-macroglobulin receptor-associated      | -8.5505  |
| Lrrc20    | leucine-rich repeat-containing protein 20      | 15.527   |
| Lrrc28    | leucine-rich repeat-containing protein 28      | -11.3287 |
| Ltbp4     | latent transforming growth factor beta binding | 14.8925  |
| Ly6e      | lymphocyte antigen 6E                          | -13.2266 |
| Ly6g5b    | lymphocyte antigen 6 complex locus protein G5b | 9.0531   |
| Lyg1      | lysozyme g-like protein 1 precursor            | 10.9671  |
| Lyn       | tyrosine-protein kinase Lyn isoform A          | 9.1584   |
| Macf1     | microtubule-actin crosslinking factor 1        | 19.9535  |
| Maf1      | repressor of RNA polymerase III transcription  | 12.2783  |
| Mafk      | transcription factor MafK                      | -18.2535 |
| Mamdc4    | apical endosomal glycoprotein precursor        | 10.3232  |
| Map1lc3a  | microtubule-associated proteins 1A/1B light    | 15.464   |
| Map1s     | microtubule-associated protein 1S              | -9.5293  |
| Map3k1    | mitogen-activated protein kinase kinase kinase | 17.3978  |
| Map4k1    | mitogen-activated protein kinase kinase kinase | 10.85    |
| Map7d1    | MAP7 domain-containing protein 1               | 13.0781  |
| Map7d1    | MAP7 domain-containing protein 1               | -14.822  |
| Mapk3     | mitogen-activated protein kinase 3             | 14.79    |
| Maz       | MYC-associated zinc finger protein             | 8.0817   |
| Mbp       | Golli-Mbp isoform 1                            | 17.3745  |
| Mcf2l     | guanine nucleotide exchange factor DBS         | -8.6856  |

|           |                                                  |          |
|-----------|--------------------------------------------------|----------|
| Mcf2l     | guanine nucleotide exchange factor DBS           | 14.6208  |
| Mea1      | male-enhanced antigen 1                          | -11.4041 |
| Mecom     | MDS1 and EV1 complex locus protein EV1           | 12.157   |
| Mecr      | trans-2-enoyl-CoA reductase, mitochondrial       | -13.4875 |
| Med10     | mediator complex subunit 10                      | -10.5878 |
| Med16     | mediator of RNA polymerase II transcription      | -16.5406 |
| Med17     | mediator of RNA polymerase II transcription      | 9.8183   |
| Med28     | mediator of RNA polymerase II transcription      | -17.6922 |
| Mei1      | meiosis inhibitor protein 1                      | -16.4322 |
| Metap2    | methionine aminopeptidase 2                      | 11.8931  |
| Mettl7a   | methyltransferase-like protein 7A                | -12.5356 |
| Mfsd3     | major facilitator superfamily domain-containing  | -8.8134  |
| Mfsd7     | major facilitator superfamily domain-containing  | 12.9658  |
| MGC114492 | hypothetical protein LOC317324                   | 10.2671  |
| MGC114520 | hypothetical protein LOC315915                   | 8.735    |
| MGC94282  |                                                  | -10.7406 |
| MGC94282  |                                                  | -10.7406 |
| Mgst1     | microsomal glutathione S-transferase 1           | 12.5129  |
| Mir195    |                                                  | -8.3     |
| Mir219-1  |                                                  | 9.8722   |
| Mir219-1  |                                                  | -8.9802  |
| Mir330    |                                                  | -15.0511 |
| Mir339    |                                                  | -12.2366 |
| Mir3569   |                                                  | 11.3387  |
| Mir483    |                                                  | -12.395  |
| Mir497    |                                                  | -8.3     |
| Mir702    |                                                  | -9.9645  |
| Mis12     | protein MIS12 homolog                            | -13.9606 |
| Mis12     | protein MIS12 homolog                            | 16.867   |
| Mkks      | McKusick-Kaufman/Bardet-Biedl syndromes putative | 12.2112  |
| Mlf1ip    | centromere protein U                             | -14.921  |
| Mlph      | melanophilin                                     | 13.1052  |
| Mlx       | transcription factor-like 4                      | -9.3608  |
| Morn1     | MORN repeat-containing protein 1                 | -12.7763 |
| Morn5     | MORN repeat-containing protein 5                 | 18.997   |
| Moxd2     | monooxygenase, DBH-like 2                        | 18.4012  |
| Mpst      | 3-mercaptopyruvate sulfurtransferase             | 8.85     |
| Mpst      | 3-mercaptopyruvate sulfurtransferase             | 12.4805  |
| mrpl11    | 39S ribosomal protein L11, mitochondrial         | -18.4846 |
| Mrpl12    | 39S ribosomal protein L12, mitochondrial         | 14.2308  |
| Mrpl27    | 39S ribosomal protein L27, mitochondrial         | -19.4205 |
| Mrpl35    | 39S ribosomal protein L35, mitochondrial         | -11.2    |
| Mrpl38    | 39S ribosomal protein L38, mitochondrial         | -14.4202 |
| Mrpl43    | 39S ribosomal protein L43, mitochondrial         | 10.935   |
| Mrps9     | mitochondrial ribosomal protein S9               | -17.8071 |
| Mst1r     | macrophage-stimulating protein receptor          | 15.9605  |
| Mt1a      | metallothionein-1                                | -10.9501 |
| Mt2A      | metallothionein 2A                               | -10.9501 |

|         |                                                 |          |
|---------|-------------------------------------------------|----------|
| Mtch2   | mitochondrial carrier homolog 2                 | -8.7269  |
| Mtf1    | metal regulatory transcription factor 1         | -9.128   |
| Mthfd2l | probable bifunctional methylenetetrahydrofolate | -15.416  |
| Mthfd2l | probable bifunctional methylenetetrahydrofolate | -12.9286 |
| Mtmt14  | myotubularin-related protein 14                 | 14.0979  |
| Mtmt7   | myotubularin-related protein 7                  | -10.8296 |
| Mtor    | serine/threonine-protein kinase mTOR            | 10.0935  |
| Mtus1   | microtubule-associated tumor suppressor 1       | -10.1619 |
| Murc    | muscle-related coiled-coil protein              | 13.4414  |
| Mvp     | major vault protein                             | 8.222    |
| Mybpc2  | myosin-binding protein C, fast-type             | 13.3269  |
| Myo5b   | myosin-Vb                                       | 16.8172  |
| Mypop   | myb-related transcription factor, partner of    | 17.5268  |
| Mypop   | myb-related transcription factor, partner of    | 12.72    |
| Myrip   | rab effector MyRIP                              | 20.6589  |
| Nab1    | NGFI-A-binding protein 1                        | -9.1853  |
| Nagpa   | N-acetylglucosamine-1-phosphodiester            | -12.5607 |
| Nags    | N-acetylglutamate synthase, mitochondrial       | -15.996  |
| Nags    | N-acetylglutamate synthase, mitochondrial       | 16.3127  |
| Nap1l2  | nucleosome assembly protein 1-like 2            | 16.4368  |
| Napa    | alpha-soluble NSF attachment protein            | 12.959   |
| Ncapd3  | non-SMC condensin II complex, subunit D3        | 16.1786  |
| Ncaph2  | condensin-2 complex subunit H2                  | -14.5792 |
| Ncaph2  | condensin-2 complex subunit H2                  | -13.2722 |
| Ndufa6  | NADH dehydrogenase [ubiquinone] 1 alpha         | 20.904   |
| Ndufa8  | NADH dehydrogenase [ubiquinone] 1 alpha         | 18.997   |
| Ndufb11 | NADH dehydrogenase [ubiquinone] 1 beta          | 10.4473  |
| Ndufb8  | NADH dehydrogenase [ubiquinone] 1 beta          | -15.9521 |
| Necab3  | N-terminal EF-hand calcium binding protein 3    | 12.6335  |
| Nedd1   | protein NEDD1                                   | 9.2485   |
| Nek11   | serine/threonine-protein kinase Nek11           | -8.7333  |
| Nek8    | serine/threonine-protein kinase Nek8            | -13.8433 |
| Nell1   | protein kinase C-binding protein NELL1          | -16.7666 |
| Nepn    | nephrocan                                       | -8.36    |
| Neu4    | sialidase-4                                     | 10.0707  |
| Neurod6 | neurogenic differentiation 6                    | 11.1507  |
| Neurog1 | neurogenin-1                                    | -8.5056  |
| Ngdn    | neuroguidin                                     | -13.8259 |
| Ngfr    | tumor necrosis factor receptor superfamily      | -15.8421 |
| Nhlh2   | helix-loop-helix protein 2                      | -12.6084 |
| Nif3l1  | NIF3-like protein 1                             | -11.1576 |
| Nkain4  | sodium/potassium-transporting ATPase subunit    | 13.0343  |
| Nkapl   | NKAP-like protein                               | 17.89    |
| Nkx2-2  | NK2 homeobox 2                                  | 19.2614  |
| NMS     | neuromedin-S precursor                          | 9.7247   |
| Nomo1   | nodal modulator 1                               | -14.1499 |
| Notch1  | neurogenic locus notch homolog protein 1        | 8.635    |
| Notch3  | neurogenic locus notch homolog protein 3        | -12.8441 |



|         |                                                 |          |
|---------|-------------------------------------------------|----------|
| Nox4    | NADPH oxidase 4                                 | -12.0305 |
| Npas4   | neuronal PAS domain-containing protein 4        | -12.882  |
| Npffr2  | neuropeptide FF receptor 2                      | 8.9328   |
| Nphs1   | nephrin                                         | 10.9049  |
| Npr3    | atrial natriuretic peptide receptor 3 precursor | 14.6095  |
| Nptx2   | neuronal pentraxin-2 precursor                  | 9.1213   |
| Nqo2    | ribosyldihydropyridine dehydrogenase            | 8.3595   |
| Nr3c2   | mineralocorticoid receptor                      | 12.27    |
| Nr4a2   | nuclear receptor subfamily 4 group A member 2   | 16.1224  |
| Nradd   | neurotrophin receptor associated death domain   | -13.533  |
| Nrd1    | nardilysin precursor                            | -8.1717  |
| Nrsn2   | neurensin-2                                     | 12.8447  |
| Nsmce1  | non-structural maintenance of chromosomes       | -12.6496 |
| Ntng1   | netrin-G1                                       | -8.555   |
| Ntrk2   | BDNF/NT-3 growth factors receptor isoform 3     | -13.7334 |
| Nudt2   | bis(5'-nucleosyl)-tetrphosphatase               | -12.8158 |
| Nup98   | nuclear pore complex protein Nup98              | 16.5385  |
| Nvl     | nuclear valosin-containing protein-like         | 8.973    |
| Nxph4   | neurexophilin-4 precursor                       | -12.9221 |
| Nxt2    | NTF2-related export protein 2                   | 20.2143  |
| Obfc1   | CST complex subunit STN1                        | -11.1606 |
| Obfc2a  | SOSS complex subunit B2                         | -9.7153  |
| Obfc2b  | SOSS complex subunit B1                         | -11.61   |
| Obp1f   | odorant-binding protein precursor               | 11.688   |
| Ociad1  | OCIA domain-containing protein 1                | 10.672   |
| Odf2    | outer dense fiber protein 2 isoform 1           | -10.9167 |
| Odf2    | outer dense fiber protein 2 isoform 2           | -10.9167 |
| Odf3b   | outer dense fiber protein 3B                    | 14.6722  |
| Ogfr    | opioid growth factor receptor                   | -16.157  |
| Olfml2b | olfactomedin-like protein 2B                    | -10.909  |
| Olr1012 | olfactory receptor Olr1012                      | 8.7928   |
| Olr1052 | olfactory receptor Olr1052                      | 17.6546  |
| Olr106  | olfactory receptor Olr106                       | 8.8643   |
| Olr1070 | olfactory receptor Olr1070                      | 9.6175   |
| Olr1105 | olfactory receptor Olr1105                      | 15.3113  |
| Olr1186 | olfactory receptor Olr1186                      | 12.0238  |
| Olr121  | olfactory receptor Olr121                       | 11.9055  |
| Olr122  | olfactory receptor Olr122                       | 23.0296  |
| Olr1242 | olfactory receptor Olr1242                      | 10.3908  |
| Olr1274 | olfactory receptor Olr1274                      | 10.1034  |
| Olr1279 | olfactory receptor Olr1279                      | 9.2153   |
| Olr1295 | olfactory receptor Olr1295                      | 13.6601  |
| Olr137  | olfactory receptor Olr137                       | -9.9337  |
| Olr1386 | olfactory receptor Olr1386                      | -21.6897 |
| Olr155  | olfactory receptor Olr155                       | 12.1278  |
| Olr1570 | olfactory receptor Olr1570                      | 18.895   |
| Olr1600 | olfactory receptor Olr1600                      | -8.5015  |
| Olr1612 | olfactory receptor Olr1612                      | -11.7765 |

|         |                                             |          |
|---------|---------------------------------------------|----------|
| Olr1637 | olfactory receptor Olr1637                  | 15.4373  |
| Olr203  | olfactory receptor Olr203                   | 17.4811  |
| Olr378  | olfactory receptor Olr378                   | 16.4151  |
| Olr39   | olfactory receptor Olr39                    | 12.7033  |
| Olr390  | olfactory receptor Olr390                   | -9.2405  |
| Olr401  | olfactory receptor Olr401                   | 9.8516   |
| Olr420  | olfactory receptor Olr420                   | 16.2818  |
| Olr44   | olfactory receptor Olr44                    | 9.4716   |
| Olr464  | olfactory receptor Olr464                   | 18.3585  |
| Olr465  | olfactory receptor Olr465                   | 18.3585  |
| Olr468  | olfactory receptor Olr468                   | 10.969   |
| Olr469  | olfactory receptor Olr469                   | 10.969   |
| Olr479  | olfactory receptor Olr479                   | 15.9792  |
| Olr488  | olfactory receptor Olr488                   | 12.3673  |
| Olr495  | olfactory receptor Olr495                   | 17.1486  |
| Olr499  | olfactory receptor Olr499                   | 15.6805  |
| Olr507  | olfactory receptor Olr507                   | 21.6372  |
| Olr528  | olfactory receptor Olr528                   | 20.296   |
| Olr531  | olfactory receptor Olr531                   | 19.6479  |
| Olr537  | olfactory receptor Olr537                   | 12.6468  |
| Olr550  | olfactory receptor Olr550                   | 20.0343  |
| Olr566  | olfactory receptor Olr566                   | 10.3865  |
| Olr567  | olfactory receptor Olr567                   | 9.9458   |
| Olr569  | olfactory receptor Olr569                   | 9.9458   |
| Olr598  | olfactory receptor Olr598                   | 11.8971  |
| Olr631  | olfactory receptor Olr631                   | 18.8151  |
| Olr636  | olfactory receptor Olr636                   | 19.9094  |
| Olr652  | olfactory receptor Olr652                   | 9.4843   |
| Olr659  | olfactory receptor Olr659                   | 11.3944  |
| Olr670  | olfactory receptor Olr670                   | 12.5423  |
| Olr681  | olfactory receptor Olr681                   | 10.4577  |
| Olr717  | olfactory receptor Olr717                   | 9.9949   |
| Olr720  | olfactory receptor Olr720                   | 9.272    |
| Olr724  | olfactory receptor Olr724                   | 8.9244   |
| Olr741  | olfactory receptor Olr741                   | 10.276   |
| Olr747  | olfactory receptor Olr747                   | 24.0038  |
| Olr767  | olfactory receptor Olr767                   | 9.5954   |
| Olr770  | olfactory receptor Olr770                   | 12.4213  |
| Olr809  | olfactory receptor Olr809                   | 8.2752   |
| Olr839  | olfactory receptor Olr839                   | 10.9279  |
| Olr855  | olfactory receptor Olr855                   | 11.1151  |
| Olr947  | olfactory receptor Olr947                   | 13.4243  |
| Olr95   | olfactory receptor Olr95                    | 9.4459   |
| Oma1    | metalloendopeptidase OMA1, mitochondrial    | -9.43    |
| Onecut1 | hepatocyte nuclear factor 6                 | -14.1911 |
| Orai3   | protein orai-3                              | -16.6269 |
| Osbpl9  | oxysterol binding protein-like 9            | -15.452  |
| Osmr    | oncostatin-M-specific receptor subunit beta | 8.379    |

|         |                                                   |          |
|---------|---------------------------------------------------|----------|
| Ostm1   | osteopetrosis-associated transmembrane protein    | 18.386   |
| Otop1   | otopettrin-1                                      | -9.074   |
| Otub2   | ubiquitin thioesterase OTUB2                      | -14.7783 |
| Ovca2   | candidate tumor suppressor in ovarian cancer 2    | 8.5712   |
| Oxtr    | oxytocin receptor                                 | -14.2865 |
| P2rx7   | P2X purinoceptor 7                                | -9.2094  |
| Pacrg   | Park2 co-regulated                                | 11.496   |
| Palm    | paralemmin                                        | 11.6181  |
| Paqr7   | progesterin and adipoQ receptor family member VII | 13.4973  |
| Pard6a  | partitioning defective 6 homolog alpha isoform    | 13.7697  |
| Pard6a  | partitioning defective 6 homolog alpha isoform    | 13.7697  |
| Park2   | E3 ubiquitin-protein ligase parkin                | 11.496   |
| Pax2    | paired box protein Pax-2                          | -12.7956 |
| Pax2    | paired box protein Pax-2                          | 16.31    |
| Pax8    | paired box protein Pax-8                          | 16.4217  |
| Pbx4    | pre-B-cell leukemia transcription factor 4        | -9.7616  |
| Pc      | pyruvate carboxylase, mitochondrial precursor     | -10.3466 |
| Pcdh21  | cadherin-related family member 1 precursor        | 10.0234  |
| Pcdh8   | protocadherin-8                                   | -12.2602 |
| Pcdh8   | protocadherin-8                                   | -12.9383 |
| Pcdha5  | protocadherin alpha-5                             | 13.9066  |
| Pcdha6  | protocadherin alpha-6                             | 13.9066  |
| Pcdha6  | protocadherin alpha-6                             | 10.7458  |
| Pcdha7  | protocadherin alpha-7                             | 10.7458  |
| Pcdhga3 | protocadherin gamma-A3                            | 16.5724  |
| Pcdhga3 | protocadherin gamma-A3                            | 15.9705  |
| Pcdhga5 | protocadherin gamma-A5                            | 8.0031   |
| Pcdhga9 | protocadherin gamma-A9                            | 8.4278   |
| Pcsk4   | proprotein convertase subtilisin/kexin type 4     | 8.8584   |
| Pctk3   | cell division protein kinase 18                   | 16.6274  |
| Pdcd6   | programmed cell death protein 6                   | 12.3625  |
| Pdcd7   | programmed cell death protein 7                   | -15.3092 |
| Pdcl3   | phosducin-like protein 3                          | -11.9414 |
| Pde5a   | cGMP-specific 3',5'-cyclic phosphodiesterase      | -8.6055  |
| Pdgfc   | platelet-derived growth factor C                  | 11.08    |
| Pdgfd   | platelet-derived growth factor D                  | 10.0818  |
| Pdha2   | pyruvate dehydrogenase E1 component subunit       | 12.7804  |
| Pdia2   | protein disulfide-isomerase A2                    | -14.164  |
| Pdzd2   | PDZ domain-containing protein 2                   | 16.6885  |
| Peo1    | twinkle protein, mitochondrial                    | 10.935   |
| Pex12   | peroxisome assembly protein 12                    | -16.2212 |
| Pfkfb1  | 6-phosphofructo-2-kinase/fructose-2,              | -12.5873 |
| Pfkb    | 6-phosphofructokinase type C                      | -9.5288  |
| Pgap2   | post-GPI attachment to proteins factor 2          | 16.5385  |
| Pgcp    | plasma glutamate carboxypeptidase precursor       | 12.2952  |
| Phb     | prohibitin                                        | 12.5498  |
| Phf13   | PHD finger protein 13                             | 11.4789  |
| Phf20   | PHD finger protein 20                             | -11.1448 |

|         |                                                  |          |
|---------|--------------------------------------------------|----------|
| Phf5a   | PHD finger-like domain-containing protein 5A     | -8.8057  |
| Phkb    | phosphorylase b kinase regulatory subunit beta   | 13.9479  |
| Phpt1   | phosphohistidine phosphatase 1                   | 10.3232  |
| Phyh    | phytanoyl-CoA dioxygenase, peroxisomal           | 14.9723  |
| Phyhipl | phytanoyl-CoA hydroxylase-interacting            | -10.8712 |
| Pi4ka   | phosphatidylinositol 4-kinase alpha              | -10.465  |
| Pigt    | GPI transamidase component PIG-T                 | 10.4842  |
| Pigx    | phosphatidylinositol-glycan biosynthesis class X | 9.2838   |
| Pik3ap1 | phosphoinositide 3-kinase adapter protein 1      | 8.7677   |
| Pik3c2g | phosphatidylinositol-4-phosphate 3-kinase C2     | 17.799   |
| Pink1   | serine/threonine-protein kinase PINK1,           | -10.0733 |
| Pion    | protein pigeon homolog                           | -10.2042 |
| Pip4k2a | phosphatidylinositol-5-phosphate 4-kinase type-2 | -15.4844 |
| Pip4k2b | phosphatidylinositol-5-phosphate 4-kinase type-2 | -13.2182 |
| Pitpnm1 | membrane-associated phosphatidylinositol         | -12.38   |
| Pitx2   | pituitary homeobox 2 isoform 1                   | -13.8703 |
| Pitx3   | pituitary homeobox 3                             | 13.736   |
| Pkd2l1  | polycystic kidney disease 2-like 1 protein       | 19.0468  |
| Pkm2    | pyruvate kinase isozymes M1/M2                   | -8.9257  |
| Pla2g6  | 85 kDa calcium-independent phospholipase A2      | -12.753  |
| Plac1   | placenta-specific protein 1 precursor            | 12.972   |
| Plagl2  | pleiomorphic adenoma gene-like 2                 | -8.5735  |
| Pld3    | phospholipase D3                                 | 10.4792  |
| Plod1   | procollagen-lysine,2-oxoglutarate 5-dioxygenase  | -16.1091 |
| Plod2   | procollagen-lysine,2-oxoglutarate 5-dioxygenase  | 11.0994  |
| Plod3   | procollagen-lysine,2-oxoglutarate 5-dioxygenase  | -9.9645  |
| Plp2    | proteolipid protein 2                            | 14.2954  |
| Pmaip1  | phorbol-12-myristate-13-acetate-induced protein  | 16.0953  |
| Pmfbp1  | polyamine-modulated factor 1-binding protein 1   | 9.4797   |
| Pmp22   | peripheral myelin protein 22                     | 14.9892  |
| Pnkp    | bifunctional polynucleotide phosphatase/kinase   | -10.007  |
| Pnkp    | bifunctional polynucleotide phosphatase/kinase   | 9.4611   |
| Pnma3   | paraneoplastic antigen MA3                       | -13.0283 |
| Pnrc1   | proline-rich nuclear receptor coactivator 1      | -16.2799 |
| Pofut1  | GDP-fucose protein O-fucosyltransferase 1        | -8.5735  |
| Pola2   | DNA polymerase alpha subunit B                   | 10.5685  |
| Poldip2 | polymerase delta-interacting protein 2           | -9.3358  |
| Polg2   | DNA polymerase subunit gamma-2, mitochondrial    | 13.7913  |
| Polk    | DNA polymerase kappa                             | 14.9771  |
| Polr2g  | DNA-directed RNA polymerase II subunit RPB7      | -19.7861 |
| Polr3gl | DNA-directed RNA polymerase III subunit          | -9.1861  |
| Polrmt  | DNA-directed RNA polymerase, mitochondrial       | -9.4538  |
| Pon1    | serum paraoxonase/arylesterase 1                 | 12.4732  |
| Pou2f3  | POU domain, class 2, transcription factor 3      | -11.2884 |
| Pou4f2  | POU domain, class 4, transcription factor 2      | -11.3714 |
| Pou5f2  | POU domain, class 5, transcription factor 2      | 16.1774  |
| Ppap2c  | lipid phosphate phosphohydrolase 2               | 9.715    |
| Ppil3   | peptidyl-prolyl cis-trans isomerase-like 3       | -11.1576 |

|          |                                                  |          |
|----------|--------------------------------------------------|----------|
| Ppp1ca   | serine/threonine-protein phosphatase PP1-alpha   | -11.28   |
| Ppp1r12b | protein phosphatase 1 regulatory subunit 12B     | -9.839   |
| Ppp2r1b  | serine/threonine-protein phosphatase 2A 65 kDa   | -14.0021 |
| Ppt2     | lysosomal thioesterase PPT2 precursor            | -11.9204 |
| Ppt2     | lysosomal thioesterase PPT2 precursor            | -13.4118 |
| Praf2    | PRA1 family protein 2                            | 11.546   |
| Prcp     | lysosomal Pro-X carboxypeptidase                 | -11.8159 |
| Prdx2    | peroxiredoxin-2                                  | -11.3583 |
| Prima1   | proline rich membrane anchor 1                   | 11.1433  |
| Prkaca   | cAMP-dependent protein kinase catalytic subunit  | -15.867  |
| Prkcz    | protein kinase C zeta type                       | -20.4568 |
| Prlh     | prolactin-releasing peptide precursor            | 12.4691  |
| Prmt7    | protein arginine N-methyltransferase 7           | 11.19    |
| Prpf4b   | serine/threonine-protein kinase PRP4 homolog     | -9.9134  |
| Prph     | peripherin                                       | -13.641  |
| Prr5l    | proline-rich protein 5-like                      | 9.4567   |
| Prrg4    | transmembrane gamma-carboxyglutamic acid protein | 8.1456   |
| Prrg4    | transmembrane gamma-carboxyglutamic acid protein | 10.4667  |
| Prrt1    | proline-rich transmembrane protein 1             | -11.9204 |
| Prrt1    | proline-rich transmembrane protein 1             | -13.4118 |
| Prss34   | mastin                                           | 15.1316  |
| Prssl1   | serine protease 1-like protein 1                 | 11.6181  |
| Psd      | PH and SEC7 domain-containing protein 1          | 11.88    |
| Psm1     | proteasome subunit alpha type-1                  | 12.4297  |
| Psm6     | proteasome subunit alpha type-6                  | -8.6657  |
| Psmc3    | 26S protease regulatory subunit 6A               | -12.1239 |
| Psmc3ip  | homologous-pairing protein 2 homolog             | -11.7308 |
| Psmg1    | proteasome assembly chaperone 1                  | -13.8439 |
| Psmg4    | proteasome (prosome, macropain) assembly         | -10.5892 |
| Pstpip1  | proline-serine-threonine phosphatase-interacting | -10.5384 |
| Ptdss2   | phosphatidylserine synthase 2                    | -13.005  |
| Pten     | phosphatidylinositol-3,4,5-trisphosphate         | 13.5917  |
| Ptf1a    | pancreas transcription factor 1 subunit alpha    | -15.2274 |
| Ptger1   | prostaglandin E2 receptor EP1 subtype            | 11.8044  |
| Ptges    | prostaglandin E synthase                         | -14.6612 |
| Ptgis    | prostacyclin synthase                            | -8.5792  |
| Ptpn14   | tyrosine-protein phosphatase non-receptor type   | -11.5684 |
| Ptpru    | receptor-type tyrosine-protein phosphatase U     | -13.4875 |
| Pycr1    | pyrroline-5-carboxylate reductase 1              | -13.748  |
| Pygo2    | pygopus homolog 2                                | -12.6338 |
| Qdpr     | dihydropteridine reductase                       | -14.2023 |
| Qsox1    | sulfhydryl oxidase 1 isoform A                   | -16.1538 |
| Qrt1     | queuine tRNA-ribosyltransferase                  | 13.307   |
| R3hdm1   | R3H domain-containing protein 1                  | -18.9133 |
| Rab19    | ras-related protein Rab-19                       | -11.1914 |
| Rab33a   | ras-related protein Rab-33A                      | -13.23   |
| Rab39    | RAB39, member RAS oncogene family                | 12.6447  |
| Rab3a    | ras-related protein Rab-3A                       | -10.5477 |

|            |                                                  |          |
|------------|--------------------------------------------------|----------|
| Rab3il1    | guanine nucleotide exchange factor for Rab-3A    | 12.7397  |
| Rab5b      | ras-related protein Rab-5B                       | -12.0655 |
| Rab6a      | ras-related protein Rab-6A                       | -16.9061 |
| Rabac1     | prenylated Rab acceptor protein 1                | 14.7783  |
| Racgap1    | rac GTPase-activating protein 1                  | -10.7369 |
| Ramp2      | receptor activity-modifying protein 2 precursor  | -13.4277 |
| Ranbp6     | ran-binding protein 6                            | -12.536  |
| Rarres2    | retinoic acid receptor responder protein 2       | 18.8355  |
| Rasal1     | rasGAP-activating-like protein 1                 | -11.0359 |
| Rbbp7      | histone-binding protein RBBP7                    | -16.1209 |
| Rbck1      | ranBP-type and C3HC4-type zinc finger-containing | -11.702  |
| Rbl2       | retinoblastoma-like protein 2                    | 8.5616   |
| Rbm10      | RNA-binding protein 10                           | 10.4473  |
| Rbm11      | RNA binding motif protein 11                     | 11.03    |
| Rbm12      | RNA-binding protein 12                           | -15.6252 |
| Rbm17      | splicing factor 45                               | 10.68    |
| Rbm38      | RNA-binding protein 38                           | -8.9272  |
| Rbp1       | retinol-binding protein 1                        | 10.6412  |
| Rcn2       | reticulocalbin-2                                 | 21.0227  |
| Reep6      | receptor expression-enhancing protein 6          | 8.8584   |
| Reg3b      | regenerating islet-derived protein 3-beta        | 25.3699  |
| Rel2       | RELT-like protein 2                              | -11.8654 |
| Repin1     | replication initiator 1                          | 15.8329  |
| Rer1       | protein RER1                                     | -12.7763 |
| Rest       | RE1-silencing transcription factor               | -9.4188  |
| Rexo4      | XPMC2 prevents mitotic catastrophe 2 homolog     | -8.2933  |
| Rfc2       | replication factor C subunit 2                   | 19.2122  |
| Rfk        | riboflavin kinase                                | -12.9376 |
| Rfxap      | regulatory factor X-associated protein           | 15.1801  |
| RGD1304580 | nesprin-4                                        | 10.37    |
| RGD1305178 | hypothetical protein LOC311855                   | -10.665  |
| RGD1305215 | hypothetical protein LOC307643                   | -15.9145 |
| RGD1305350 | hypothetical protein LOC313699                   | -16.1091 |
| RGD1305592 | PAXIP1-associated protein 1                      | 8.222    |
| RGD1306151 | hypothetical protein LOC362455                   | 14.5156  |
| RGD1306441 | hypothetical protein LOC290425                   | 8.5003   |
| RGD1306613 | hypothetical protein LOC306994                   | -14.1202 |
| RGD1307399 | hypothetical protein LOC681315                   | -15.6881 |
| RGD1307851 | ig-like V-type domain-containing protein FAM187A | -8.1116  |
| RGD1308134 | hypothetical protein LOC287452                   | -11.1204 |
| RGD1308612 | MRG-binding protein                              | -16.157  |
| RGD1308759 | hypothetical protein LOC290668                   | -12.1    |
| RGD1309188 | hypothetical protein LOC315463                   | 14.198   |
| RGD1309765 | hypothetical protein LOC290746                   | -11.9691 |
| RGD1310212 | hypothetical protein LOC299557                   | 12.9356  |
| RGD1310311 | protein kintoun                                  | 13.6926  |
| RGD1310324 | zinc finger, SWIM-type containing 7              | -11.5266 |
| RGD1310352 | hypothetical protein LOC303122                   | 15.7149  |

|            |                                                 |          |
|------------|-------------------------------------------------|----------|
| RGD1310597 | centrosomal protein POC5                        | -9.6552  |
| RGD1311659 | hypothetical protein LOC364814                  | 19.7137  |
| RGD1311892 | hypothetical protein LOC289399                  | 20.2906  |
| RGD1359378 | mesenchymal stem cell protein DSCD75 precursor  | 14.6918  |
| RGD1359452 | hypothetical protein LOC296118                  | 11.485   |
| RGD1359452 | hypothetical protein LOC296118                  | 10.7883  |
| RGD1559493 | hypothetical protein LOC500516                  | -16.0732 |
| RGD1559589 | hypothetical protein LOC302368                  | 21.4218  |
| RGD1559613 | hypothetical protein LOC499067                  | -17.7364 |
| RGD1559690 | nitric oxide-inducible gene protein             | -11.8159 |
| RGD1560271 | hypothetical protein LOC501097                  | -15.2292 |
| RGD1560324 | hypothetical protein LOC295072                  | 9.1643   |
| RGD1560350 | hypothetical protein LOC365554                  | 10.2915  |
| RGD1560455 | hypothetical protein LOC302377                  | 9.0411   |
| RGD1560481 | epithelial splicing regulatory protein 1        | -14.9497 |
| RGD1560888 | similar to Cell division protein kinase 8       | 8.317    |
| RGD1560927 | hypothetical protein LOC501507                  | 16.95    |
| RGD1561415 | hypothetical protein LOC498943                  | 13.7697  |
| RGD1561490 | hypothetical protein LOC367038                  | 12.5678  |
| RGD1561490 | hypothetical protein LOC367038                  | -8.0896  |
| RGD1562043 | claudin 22 like                                 | 10.3882  |
| RGD1562114 | hypothetical protein LOC500795                  | 21.0213  |
| RGD1562492 | hypothetical protein LOC499151                  | 13.2011  |
| RGD1562533 | hypothetical protein LOC498136                  | 8.5203   |
| RGD1562846 | hypothetical protein LOC502694                  | 14.5687  |
| RGD1563047 | long palate, lung and nasal epithelium          | -16.7042 |
| RGD1563072 | hypothetical protein LOC313595                  | 13.0776  |
| RGD1563263 | hypothetical protein LOC499836                  | -17.305  |
| RGD1564114 | hypothetical protein LOC499765                  | -10.1707 |
| RGD1564419 | hypothetical protein LOC500128                  | -11.568  |
| RGD1564776 | hypothetical protein LOC366473                  | 10.6025  |
| RGD1565166 | hypothetical protein LOC287059                  | -12.6707 |
| RGD1565947 | hypothetical protein LOC299737                  | -11.4983 |
| RGD1565983 | hypothetical protein LOC317628                  | -12.5873 |
| RGD1566265 | hypothetical protein LOC363487                  | -17.1282 |
| RGD1566320 | hypothetical protein LOC296207                  | -8.7916  |
| RGD621352  | hypothetical protein LOC192229                  | 9.2838   |
| Rgs11      | regulator of G-protein signaling 11             | -14.164  |
| Rgs16      | regulator of G-protein signaling 16             | -10.6455 |
| Rgs7       | regulator of G-protein signaling 7              | -12.1666 |
| Rgs8       | regulator of G-protein signaling 8              | 8.7261   |
| Rhd        | blood group Rh(D) polypeptide                   | 14.949   |
| Rhobtb2    | rho-related BTB domain-containing protein 2     | -10.6066 |
| Rhov       | rho-related GTP-binding protein RhoV            | 11.8001  |
| Rhox11     | reproductive homeobox 11                        | 10.6043  |
| Rhox12     | reproductive homeobox 12                        | 9.9503   |
| Rims1      | regulating synaptic membrane exocytosis protein | 13.8681  |
| Ring1      | E3 ubiquitin-protein ligase RING1               | 9.8722   |

|          |                                                |          |
|----------|------------------------------------------------|----------|
| Ring1    | E3 ubiquitin-protein ligase RING1              | -8.9802  |
| Rnaseh2a | ribonuclease H2 subunit A                      | -11.3583 |
| Rnasek   | ribonuclease kappa                             | -11.1204 |
| Rnaset2  | ribonuclease T2                                | 8.9305   |
| Rnf160   | zinc finger protein 294                        | 16.0692  |
| Rnf167   | E3 ubiquitin-protein ligase RNF167 precursor   | -11.9585 |
| Rnf215   | RING finger protein 215                        | -8.9857  |
| Rnf26    | RING finger protein 26                         | -11.8607 |
| Rnf34    | E3 ubiquitin-protein ligase RNF34              | 12.4983  |
| Rnf41    | E3 ubiquitin-protein ligase NRDP1              | -11.61   |
| Rnf5     | E3 ubiquitin-protein ligase RNF5               | -11.1754 |
| Robo3    | roundabout homolog 3                           | -17.4402 |
| Rora     | nuclear receptor ROR-alpha                     | -11.2566 |
| Rpl11    | 60S ribosomal protein L11                      | 15.6159  |
| Rpl22    | 60S ribosomal protein L22                      | -13.5439 |
| Rpl23    | 60S ribosomal protein L23                      | -10.4892 |
| Rpl29    | 60S ribosomal protein L29                      | -12.5944 |
| Rpl3     | 60S ribosomal protein L3                       | -14.8652 |
| Rpl30    | 60S ribosomal protein L30                      | 12.0874  |
| Rpl5     | 60S ribosomal protein L5                       | 13.3501  |
| Rpp25    | ribonuclease P protein subunit p25             | 13.989   |
| Rps15a   | 40S ribosomal protein S15a                     | -11.38   |
| Rps25    | 40S ribosomal protein S25                      | -11.2078 |
| Rps3     | 40S ribosomal protein S3                       | 13.2914  |
| Rps6     | 40S ribosomal protein S6                       | 15.989   |
| Rps6kb2  | ribosomal protein S6 kinase, polypeptide 2     | -15.8052 |
| Rpusd3   | RNA pseudouridylate synthase domain-containing | -11.7155 |
| Rreb1    | ras-responsive element-binding protein 1       | -11.871  |
| Rspo3    | R-spondin-3                                    | -14.1011 |
| RT1-A3   | RT1 class I, locus A3                          | -13.8211 |
| RT1-CE1  | RT1 class I, locus CE1                         | -20.0338 |
| RT1-CE14 | RT1 class I, locus CE14 isoform 2              | -20.0338 |
| RT1-EC2  | class I histocompatibility antigen, Non-RT1.A  | -13.8211 |
| RT1-N3   | RT1 class Ib, locus N3                         | -17.605  |
| RT1-S3   | RT1 class Ib, locus S3                         | -9.2775  |
| Rtbdn    | retbindin                                      | -12.717  |
| Rtn4rl1  | reticulon-4 receptor-like 1 precursor          | -13.0947 |
| Rwdd4a   | RWD domain-containing protein 4                | -11.9691 |
| Rxfp3    | relaxin-3 receptor 1                           | -9.6234  |
| Rxrb     | retinoic acid receptor RXR-beta                | 9.8722   |
| Rxrb     | retinoic acid receptor RXR-beta                | -8.9802  |
| Rxrg     | retinoic acid receptor RXR-gamma               | 18.3108  |
| S100a13  | protein S100-A13                               | -12.7341 |
| Sarm1    | sterile alpha and TIR motif-containing protein | -12.8276 |
| Sart3    | squamous cell carcinoma antigen recognized by  | -15.5598 |
| Sat1     | diamine acetyltransferase 1                    | 9.009    |
| Sav1     | protein salvador homolog 1                     | -13.425  |
| Sc5dl    | lathosterol oxidase                            | -12.8117 |



|          |                                                 |          |
|----------|-------------------------------------------------|----------|
| Scamp1   | secretory carrier-associated membrane protein 1 | -11.125  |
| Scamp4   | secretory carrier-associated membrane protein 4 | 19.455   |
| Scarb1   | scavenger receptor class B member 1             | -14.6028 |
| Sccpdh   | probable saccharopine dehydrogenase             | 12.0195  |
| Scn11a   | sodium channel protein type 11 subunit alpha    | 13.4128  |
| Scrg1    | scrapie-responsive protein 1 precursor          | -9.5695  |
| Scrt1    | transcriptional repressor scratch 1             | -10.5267 |
| Sdcbp    | syntenin-1                                      | -12.4283 |
| Sdr16c6  | short-chain dehydrogenase/reductase family 16C  | 20.9864  |
| Sds      | L-serine dehydratase/L-threonine deaminase      | -12.6995 |
| Sdsl     | serine dehydratase-like                         | -12.6995 |
| Sebox    | homeobox protein SEBOX                          | -12.8276 |
| Sec23a   | protein transport protein Sec23A                | -13.3985 |
| Sel1l    | protein sel-1 homolog 1                         | -11.5267 |
| Selp     | P-selectin                                      | 9.2412   |
| Sema3b   | semaphorin-3B                                   | 17.076   |
| Sema5a   | semaphorin 5A                                   | 12.8346  |
| Serinc2  | serine incorporator 2                           | -9.7038  |
| Serp1    | stress-associated endoplasmic reticulum protein | -10.4788 |
| Sf4      | splicing factor 4                               | -12.1    |
| Sfrs14   | splicing factor, arginine/serine-rich 14        | -11.4334 |
| Sfrs3    | splicing factor, arginine/serine-rich 3         | -10.6112 |
| Sgcb     | beta-sarcoglycan                                | -10.43   |
| Sh2b2    | SH2B adapter protein 2                          | 14.1329  |
| Sharnp   | sharnp                                          | 12.2783  |
| Shprh    | E3 ubiquitin-protein ligase SHPRH               | 11.8156  |
| Sigirr   | single Ig IL-1-related receptor                 | -13.7255 |
| Sim2     | single-minded homolog 2                         | 15.2757  |
| Sip1     | survival of motor neuron protein-interacting    | -13.3985 |
| Sipa1l1  | signal-induced proliferation-associated 1-like  | -11.1846 |
| Six3     | homeobox protein SIX3                           | -17.1187 |
| Ska1     | spindle and kinetochore-associated protein 1    | -11.0295 |
| Skap2    | src kinase-associated phosphoprotein 2          | -9.075   |
| Slc10a4  | sodium/bile acid cotransporter 4                | 11.1645  |
| Slc10a7  | sodium/bile acid cotransporter 7                | 13.2577  |
| Slc12a5  | solute carrier family 12 member 5               | -13.1055 |
| Slc13a2  | solute carrier family 13 member 2               | 12.4813  |
| Slc16a2  | monocarboxylate transporter 8                   | 16.0639  |
| Slc17a8  | vesicular glutamate transporter 3               | 16.3046  |
| Slc22a8  | solute carrier family 22 member 8               | 13.5913  |
| Slc25a10 | mitochondrial dicarboxylate carrier             | 14.2308  |
| Slc25a11 | mitochondrial 2-oxoglutarate/malate carrier     | -11.9585 |
| Slc25a2  | mitochondrial ornithine transporter 2           | 11.5375  |
| Slc25a39 | solute carrier family 25 member 39              | -10.449  |
| Slc26a5  | prestin                                         | 12.8533  |
| Slc2a5   | solute carrier family 2, facilitated glucose    | 17.3572  |
| Slc30a2  | zinc transporter 2 isoform 1                    | -12.222  |
| Slc30a2  | zinc transporter 2 isoform 2                    | -12.222  |

|          |                                                 |          |
|----------|-------------------------------------------------|----------|
| Slc31a2  | probable low affinity copper uptake protein 2   | -12.57   |
| Slc35d2  | UDP-N-acetylglucosamine/UDP-glucose/GDP-mannose | -14.0846 |
| Slc38a3  | sodium-coupled neutral amino acid transporter 3 | -17.0869 |
| Slc39a5  | zinc transporter ZIP5                           | -11.61   |
| Slc39a7  | solute carrier family 39 (zinc transporter),    | 9.8722   |
| Slc39a7  | solute carrier family 39 (zinc transporter),    | 9.8722   |
| Slc44a4  | choline transporter-like protein 4              | 12.1714  |
| Slc45a2  | membrane-associated transporter protein         | 16.0716  |
| Slc46a2  | solute carrier family 46, member 2              | 11.7245  |
| Slc5a5   | sodium/iodide cotransporter                     | 10.6907  |
| Slc6a4   | sodium-dependent serotonin transporter          | 19.4099  |
| Slc7a6os | solute carrier family 7, member 6 opposite      | 11.19    |
| Slc9a2   | sodium/hydrogen exchanger 2 isoform 1           | -9.8955  |
| Slc9a5   | sodium/hydrogen exchanger 5                     | -10.2909 |
| Slco1a5  | solute carrier organic anion transporter family | 11.5028  |
| Slco6b1  | solute carrier organic anion transporter family | 16.7217  |
| Slitrk3  | SLIT and NTRK-like protein 3                    | -15.2774 |
| Smardc1  | SWI/SNF-related matrix-associated               | 15.375   |
| Smc4     | structural maintenance of chromosomes 4         | 17.6405  |
| Smg6     | telomerase-binding protein EST1A                | -8.8061  |
| Smoc1    | SPARC-related modular calcium-binding protein 1 | -9.1216  |
| Smpdl3a  | acid sphingomyelinase-like phosphodiesterase 3a | -9.7338  |
| Smurf2   | E3 ubiquitin-protein ligase SMURF2              | -16.834  |
| Snap29   | synaptosomal-associated protein 29              | -10.465  |
| Snapc2   | snRNA-activating protein complex subunit 2      | -12.0166 |
| Sncaip   | synphilin-1                                     | -10.32   |
| Soat2    | sterol O-acyltransferase 2                      | 11.9906  |
| Sox15    | protein SOX-15                                  | -8.1759  |
| Sp5      | transcription factor Sp5                        | 17.0833  |
| Sp5      | transcription factor Sp5                        | 13.4883  |
| Spag5    | sperm-associated antigen 5                      | -8.6068  |
| Spag7    | sperm associated antigen 7                      | -15.5082 |
| Spast    | spastin                                         | 13.1787  |
| Spata18  | spermatogenesis-associated protein 18           | -10.43   |
| Spef2    | sperm flagellar protein 2                       | 10.8279  |
| Spg21    | maspardin                                       | -17.6958 |
| Spin1    | spindlin-1                                      | -11.9475 |
| Spon1    | spondin-1 precursor                             | -8.0367  |
| Spsb1    | SPRY domain-containing SOCS box protein 1       | 17.6323  |
| Sqstm1   | sequestosome-1 isoform 1                        | -11.4942 |
| Sqstm1   | sequestosome-1 isoform 2                        | -11.4942 |
| Srd5a2   | 3-oxo-5-alpha-steroid 4-dehydrogenase 2         | -8.8817  |
| Srd5a3   | probable polyprenol reductase                   | 10.86    |
| Srf      | serum response factor                           | -8.1798  |
| Srgap2   | SLIT-ROBO Rho GTPase-activating protein 2       | -15.771  |
| Srpk3    | serine/threonine-protein kinase SRPK3           | -13.5673 |
| Srr      | serine racemase                                 | -8.8061  |
| Ssbp1    | single-stranded DNA-binding protein,            | 9.6326   |

|          |                                                  |          |
|----------|--------------------------------------------------|----------|
| Sstr1    | somatostatin receptor type 1                     | -10.7498 |
| St8sia3  | sia-alpha-2,3-Gal-beta-1,4-GlcNAc-R:alpha        | -14.63   |
| Stac2    | SH3 and cysteine-rich domain-containing protein  | -9.8634  |
| Stag3    | cohesin subunit SA-3                             | 8.79     |
| Stard10  | PCTP-like protein                                | -8.6767  |
| Stat1    | signal transducer and activator of transcription | 13.5537  |
| Stat5b   | signal transducer and activator of transcription | 15.7761  |
| Steap2   | metalloreductase STEAP2                          | -11.085  |
| Stk16    | serine/threonine-protein kinase 16               | 13.2294  |
| Stk3     | serine/threonine-protein kinase 3                | -14.7348 |
| Stra6    | stimulated by retinoic acid gene 6 protein       | 15.022   |
| Stt3a    | dolichyl-diphosphooligosaccharide--protein       | -13.1698 |
| Stx12    | syntaxin 12                                      | -13.5157 |
| Suclg1   | succinyl-CoA ligase [GDP-forming] subunit alpha, | -12.5966 |
| Sulf1    | extracellular sulfatase Sulf-1 precursor         | -9.0065  |
| Suox     | sulfite oxidase, mitochondrial precursor         | -15.434  |
| Susd3    | sushi domain-containing protein 3                | -16.0851 |
| Sv2c     | synaptic vesicle glycoprotein 2C                 | -11.343  |
| Svs1     | seminal vesicle secretory protein 1              | 10.6384  |
| Syap1    | synapse-associated protein 1                     | 11.1617  |
| Syf2     | pre-mRNA-splicing factor SYF2                    | -10.1417 |
| Syngap1  | ras GTPase-activating protein SynGAP isoform 2   | -13.1403 |
| Syt1     | synaptotagmin-1                                  | 14.159   |
| Taar1    | trace amine-associated receptor 1                | 19.1889  |
| Taar4    | trace amine-associated receptor 4                | 11.8884  |
| Tap2     | antigen peptide transporter 2                    | 8.705    |
| Taz      | tafazzin                                         | 10.34    |
| Tbc1d10c | TBC1 domain family, member 10c                   | -11.28   |
| Tbc1d14  | TBC1 domain family member 14 isoform 2           | -13.6392 |
| Tbc1d17  | TBC1 domain family member 17                     | -10.007  |
| Tbc1d17  | TBC1 domain family member 17                     | 9.4611   |
| Tbc1d24  | TBC1 domain family member 24                     | 11.4585  |
| Tbcc     | tubulin-specific chaperone C                     | -9.9484  |
| Tbx18    | T-box transcription factor TBX18                 | 15.5944  |
| Tcfap4   | transcription factor AP-4                        | 9.6217   |
| Tdp1     | tyrosyl-DNA phosphodiesterase 1                  | -13.5054 |
| Tekt3    | tektin-3                                         | -20.026  |
| Tekt5    | tektin-5                                         | 19.5289  |
| Tff3     | trefoil factor 3 precursor                       | 19.0763  |
| Tgm2     | protein-glutamine gamma-glutamyltransferase 2    | -13.555  |
| Thap1    | THAP domain-containing protein 1                 | -11.4749 |
| Thoc2    | THO complex subunit 2                            | -13.9867 |
| Thrsp    | thyroid hormone-inducible hepatic protein        | 8.9609   |
| Thy1     | thy-1 membrane glycoprotein preproprotein        | -15.6127 |
| Tia1     | TIA1 cytotoxic granule-associated RNA binding    | -14.3622 |
| Timd2    | T-cell immunoglobulin and mucin                  | 14.6986  |
| Timm8a1  | mitochondrial import inner membrane translocase  | 13.4984  |
| Tktl1    | transketolase-like protein 1                     | 14.8258  |

|           |                                                  |          |
|-----------|--------------------------------------------------|----------|
| Tlcd1     | TLC domain-containing protein 1 precursor        | -13.8433 |
| Tll2      | tolloid-like protein 2                           | -19.6179 |
| Tm9sf1    | transmembrane 9 superfamily member 1 precursor   | 13.5535  |
| Tmc4      | transmembrane channel-like protein 4             | 14.6846  |
| Tmed1     | transmembrane emp24 domain-containing protein 1  | -13.8902 |
| Tmed10    | transmembrane emp24 domain-containing protein 10 | 8.4113   |
| Tmed3     | transmembrane emp24 domain-containing protein 3  | 9.0698   |
| Tmem107   | transmembrane protein 107                        | -12.0716 |
| Tmem128   | transmembrane protein 128                        | -17.4952 |
| Tmem171   | transmembrane protein 171                        | -12.5577 |
| Tmem178   | transmembrane protein 178 precursor              | 13.4646  |
| Tmem184a  | transmembrane protein 184A                       | 12.2225  |
| Tmem188   | transmembrane protein 188                        | -9.2754  |
| Tmem199   | transmembrane protein 199                        | -9.3358  |
| Tmem25    | transmembrane protein 25                         | 14.4987  |
| Tmem66    | transmembrane protein 66 precursor               | 9.7408   |
| Tmem70    | transmembrane protein 70, mitochondrial          | 14.37    |
| Tmem86b   | transmembrane protein 86B                        | -9.2959  |
| Tmem87b   | transmembrane protein 87B                        | -15.1266 |
| Tmem98    | transmembrane protein 98                         | -14.6704 |
| Tmub1     | transmembrane and ubiquitin-like                 | -9.6875  |
| Tmub1     | transmembrane and ubiquitin-like                 | -9.6875  |
| Tnfrsf12a | tumor necrosis factor receptor superfamily       | -11.9234 |
| Tnni3     | troponin I, cardiac muscle                       | 15.0377  |
| Tnnt2     | troponin T, cardiac muscle                       | 22.0444  |
| Top1mt    | DNA topoisomerase I, mitochondrial               | -13.558  |
| Tor3a     | torsin-3A precursor                              | -14.3422 |
| Tox2      | TOX high mobility group box family member 2      | -11.5766 |
| Tp73      | tumor protein p73                                | -9.0035  |
| Tpd52l1   | tumor protein D52-like 1                         | -11.5839 |
| Tpt1      | translationally-controlled tumor protein         | -10.3477 |
| Traf3     | TNF receptor-associated factor 3                 | -11.5534 |
| Trappc3   | trafficking protein particle complex subunit 3   | 13.0781  |
| Trappc3   | trafficking protein particle complex subunit 3   | -14.822  |
| Trappc4   | trafficking protein particle complex subunit 4   | -11.2078 |
| Trhr2     | thyrotropin releasing hormone receptor 2         | 14.1662  |
| Trim11    | E3 ubiquitin-protein ligase TRIM11               | -14.415  |
| Trim37    | E3 ubiquitin-protein ligase TRIM37               | -8.2283  |
| Trim54    | tripartite motif-containing protein 54           | -9.0058  |
| Trim54    | tripartite motif-containing protein 54           | 15.1881  |
| Trim65    | tripartite motif-containing protein 65           | -14.4202 |
| Trpc4ap   | short transient receptor potential channel       | -18.4109 |
| Trpm2     | transient receptor potential cation channel      | 13.6052  |
| Trpm8     | transient receptor potential cation channel      | 15.6428  |
| Trpt1     | tRNA 2'-phosphotransferase 1                     | -12.2243 |
| Trub2     | probable tRNA pseudouridine synthase 2           | -14.6102 |
| Tsc22d1   | TSC22 domain family protein 1 isoform 1          | -12.0933 |
| Tsc22d3   | TSC22 domain family protein 3                    | 13.5845  |

|         |                                                  |          |
|---------|--------------------------------------------------|----------|
| Tsen54  | tRNA-splicing endonuclease subunit Sen54         | -10.155  |
| Tsga14  | centrosomal protein of 41 kDa                    | 14.4785  |
| Tshz3   | teashirt homolog 3                               | -11.2487 |
| Tspan9  | tetraspanin-9                                    | -15.5847 |
| Tspyl2  | testis-specific Y-encoded-like protein 2         | 13.5497  |
| Tssk1   | testis-specific serine/threonine-protein kinase  | -11.8887 |
| Tssk2   | testis-specific serine/threonine-protein kinase  | -11.8887 |
| Tssk4   | testis-specific serine/threonine-protein kinase  | 13.5535  |
| Tssk6   | testis-specific serine/threonine-protein kinase  | 15.3773  |
| Tst     | thiosulfate sulfurtransferase                    | 8.85     |
| Tst     | thiosulfate sulfurtransferase                    | 12.4805  |
| Ttc1    | tetratricopeptide repeat protein 1               | -9.5681  |
| Ttc12   | tetratricopeptide repeat protein 12              | -11.4317 |
| Ttc14   | tetratricopeptide repeat protein 14              | 12.1788  |
| Ttc19   | tetratricopeptide repeat protein 19              | -11.5266 |
| Ttc22   | tetratricopeptide repeat protein 22              | -16.0732 |
| Ttc30a1 | tetratricopeptide repeat protein 30A2            | 13.9504  |
| Ttc30b  | tetratricopeptide repeat protein 30B             | 13.9504  |
| Ttc36   | tetratricopeptide repeat protein 36              | 14.4987  |
| Ttyh3   | protein tweety homolog 3                         | 13.6234  |
| Tuba1c  | tubulin alpha-1C chain                           | 15.2784  |
| Tubal3  | tubulin alpha chain-like 3                       | 14.1286  |
| Tubgcp6 | gamma-tubulin complex component 6                | 11.2893  |
| Txnip   | thioredoxin-interacting protein                  | 15.114   |
| Tymp    | thymidine phosphorylase                          | 14.6722  |
| Tyrrp1  | 5,6-dihydroxyindole-2-carboxylic acid oxidase    | 9.3422   |
| Ube2cbp | ubiquitin-conjugating enzyme E2C-binding         | 18.4607  |
| Ube2d1  | ubiquitin-conjugating enzyme E2 D1               | -11.6566 |
| Ube2t   | ubiquitin-conjugating enzyme E2 T                | -9.839   |
| Ubiad1  | ubiA prenyltransferase domain-containing protein | 10.0935  |
| Ubxn1   | UBX domain-containing protein 1                  | -8.7729  |
| Uhmk1   | serine/threonine-protein kinase Kist             | -14.1383 |
| Uimc1   | BRCA1-A complex subunit RAP80                    | 8.8967   |
| Uimc1   | BRCA1-A complex subunit RAP80                    | -13.3388 |
| Unc13a  | protein unc-13 homolog A                         | 9.9883   |
| Unc93b1 | protein unc-93 homolog B1                        | 12.4445  |
| Uncx    | homeobox protein unc-4 homolog                   | -10.2716 |
| Upk1b   | uropod protein 1b                                | 10.8687  |
| Usp20   | ubiquitin specific peptidase 20                  | -10.665  |
| Uts2d   | urotensin-2B precursor                           | 10.4503  |
| Vash2   | vasohibin-2                                      | 9.6473   |
| Vasp    | vasodilator-stimulated phosphoprotein            | -15.1845 |
| Vax2    | ventral anterior homeobox 2                      | 13.5308  |
| Vcl     | vinculin                                         | -14.5958 |
| Vegfb   | vascular endothelial growth factor B             | -12.2243 |
| Vgf     | neurosecretory protein VGF precursor             | 11.73    |
| Vhl     | von Hippel-Lindau disease tumor suppressor       | 13.2296  |
| Vom1r43 | vomerolateral 1 receptor, 43                     | 10.4947  |

|          |                                                 |          |
|----------|-------------------------------------------------|----------|
| Vps13d   | vacuolar protein sorting-associated protein 13D | 16.3816  |
| Vps25    | vacuolar protein-sorting-associated protein 25  | -13.4277 |
| Vps4b    | vacuolar protein sorting-associated protein 4B  | -16.4284 |
| Vrk3     | serine/threonine-protein kinase VRK3            | -15.8692 |
| Wdr45    | WD repeat domain phosphoinositide-interacting   | 11.546   |
| Wdr54    | WD repeat-containing protein 54                 | -12.4088 |
| Wfdc12   | WAP four-disulfide core domain protein 12       | 18.3054  |
| Wfdc5    | WAP four-disulfide core domain protein 5        | 18.3054  |
| Wiz      | protein Wiz                                     | 12.6781  |
| Wiz      | protein Wiz                                     | -12.4368 |
| Wnt1     | wingless-type MMTV integration site family,     | 9.975    |
| Wsb1     | WD repeat and SOCS box-containing 1 isoform 1   | 10.8019  |
| Wsb2     | WD repeat and SOCS box-containing protein 2     | -11.6064 |
| Wtap     | Wilms' tumour 1-associating protein isoform b   | 15.9277  |
| Wtap     | Wilms' tumour 1-associating protein isoform b   | 15.9277  |
| Xkr6     | XK-related protein 6                            | -9.3322  |
| Yeats4   | YEATS domain-containing protein 4               | -17.5295 |
| Yipf2    | protein YIPF2                                   | 14.198   |
| Zar1     | zygote arrest protein 1                         | 11.1645  |
| Zbtb1    | zinc finger and BTB domain-containing protein 1 | 15.4272  |
| Zbtb24   | zinc finger and BTB domain-containing protein   | -13.2774 |
| Zbtb3    | zinc finger and BTB domain-containing protein 3 | -19.7861 |
| Zbtb32   | zinc finger and BTB domain-containing protein   | 11.3387  |
| Zbtb44   | zinc finger and BTB domain-containing protein   | 17.2507  |
| Zbtb8a   | zinc finger and BTB domain-containing protein   | -11.6618 |
| Zbtb8b   | zinc finger and BTB domain-containing protein   | 10.1052  |
| Zc3h11a  | zinc finger CCCH domain-containing protein 11A  | -13.8904 |
| Zdhhc20  | probable palmitoyltransferase ZDHHC20           | -12.5878 |
| Zfx4     | zinc finger homeobox protein 4                  | -15.3379 |
| Zfp275   | zinc finger protein 275                         | -10.951  |
| Zfp319   | zinc finger protein 319                         | -15.9145 |
| Zfp346   | zinc finger protein 346                         | 8.8967   |
| Zfp346   | zinc finger protein 346                         | -13.3388 |
| Zfp426l2 | zinc finger protein 426                         | 14.0571  |
| Zfp428   | zinc finger protein 428                         | 14.0733  |
| Zfp438   | zinc finger protein 438                         | 11.6213  |
| Zfp61    | zinc finger protein 61                          | -11.6894 |
| Zfyve27  | zinc finger FYVE domain-containing protein 27   | 15.9448  |
| Zhx3     | zinc fingers and homeoboxes protein 3           | -8.2083  |
| Zmat3    | zinc finger matrin-type protein 3               | 17.8865  |
| Zmiz1    | zinc finger MIZ domain-containing protein 1     | -10.7817 |
| Znf521   | zinc finger protein 521                         | -10.0033 |
| Znf524   | zinc finger protein 524                         | -12.7083 |
| Znf532   | zinc finger protein 532                         | 11.29    |
| Znf575   | zinc finger protein 575                         | -8.035   |
| Znf593   | zinc finger protein 593                         | 15.5726  |
| Znf775   | zinc finger protein 775                         | 15.8329  |
| Zppp2    | zona pellucida-binding protein 2 precursor      | 11.2856  |
